# Supplementary material for: Transcriptomic Signature Differences Between SARS-CoV-2 and Influenza Virus Infected Patients
Source: PubMed Central journal article supplement (PMC8202013; doi:10.3389/fimmu.2021.666163), 2021-05-31

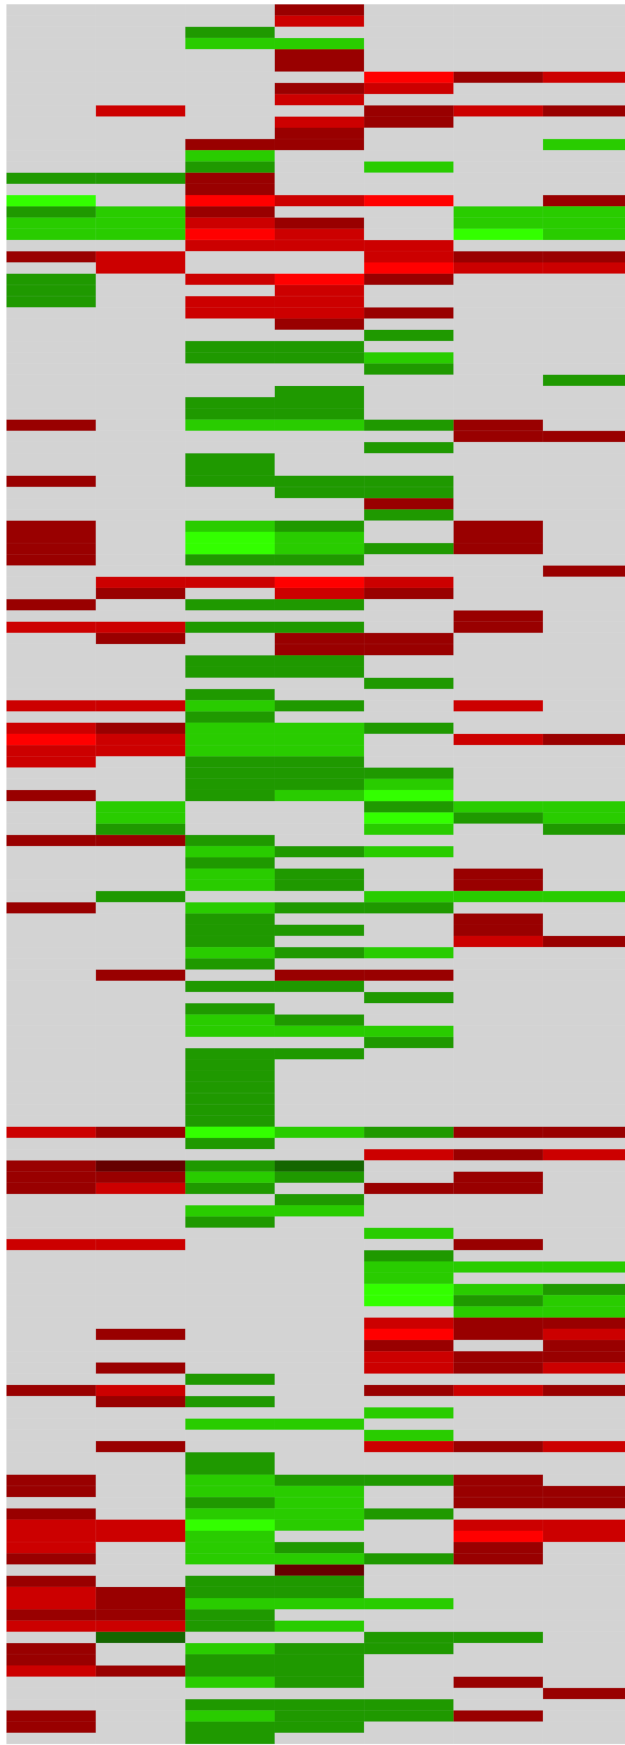

- MET hsa01200 Carbon metabolism
- MET hsa01230 Biosynthesis of amino acids
- MET hsa00052 Galactose metabolism
- MET hsa00500 Starch and sucrose metabolism
- MET hsa00620 Pyruvate metabolism
- MET hsa00640 Propanoate metabolism
- MET hsa00190 Oxidative phosphorylation
- MET hsa00260 Glycine, serine and threonine metabolism
- MET hsa00270 Cysteine and methionine metabolism
- MET hsa00480 Glutathione metabolism
- MET hsa00510 N-Glycan biosynthesis
- MET hsa00513 Various types of N-glycan biosynthesis
- MET hsa00515 Mannose type O-glycan biosynthesis
- MET hsa00531 Glycosaminoglycan degradation
- MET hsa00511 Other glycan degradation
- GIP hsa03020 RNA polymerase
- GIP hsa03040 Spliceosome
- GIP hsa03010 Ribosome
- GIP hsa00970 Aminoacyl-tRNA biosynthesis
- GIP hsa03013 RNA transport
- GIP hsa03008 Ribosome biogenesis in eukaryotes
- GIP hsa03060 Protein export
- GIP hsa01411 Protein processing in endoplasmic reticulum
- GIP hsa03050 Proteasome
- GIP hsa03030 DNA replication
- GIP hsa03410 Base excision repair
- GIP hsa03420 Nucleotide excision repair
- GIP hsa03430 Mismatch repair
- GIP hsa03440 Homologous recombination
- EIP hsa04014 Ras signaling pathway
- EIP hsa04015 Rap1 signaling pathway
- EIP hsa04010 MAPK signaling pathway
- EIP hsa04012 ErbB signaling pathway
- EIP hsa04390 Hippo signaling pathway
- EIP hsa04371 Apelin signaling pathway
- EIP hsa04630 JAK-STAT signaling pathway
- EIP hsa04064 NF-kappa B signaling pathway
- EIP hsa04668 TNF signaling pathway
- EIP hsa04668 FoxO signaling pathway
- EIP hsa04072 Phospholipase D signaling pathway
- EIP hsa04071 Sphingolipid signaling pathway
- EIP hsa04024 cAMP signaling pathway
- EIP hsa04060 Cytokine-cytokine receptor interaction
- EIP hsa04061 Viral protein interaction with cytokine and cytokine receptor
- EIP hsa04512 ECM-receptor interaction
- EIP hsa04514 Cell adhesion molecules
- CP hsa04144 Endocytosis
- CP hsa04145 Phagosome
- CP hsa04142 Lysosome
- CP hsa04140 Autophagy - animal
- CP hsa04137 Mitophagy - animal
- CP hsa04110 Cell cycle
- CP hsa04114 Oocyte meiosis
- CP hsa04210 Apoptosis
- CP hsa04216 Ferroptosis
- CP hsa04217 Necroptosis
- CP hsa04115 p53 signaling pathway
- CP hsa04218 Cellular senescence
- CP hsa04520 Adherens junction
- CP hsa04530 Tight junction
- CP hsa04540 Gap junction
- CP hsa04610 Regulation of actin cytoskeleton
- OS hsa04610 Complement and coagulation cascades
- OS hsa04611 Platelet activation
- OS hsa04620 Toll-like receptor signaling pathway
- OS hsa04621 NOD-like receptor signaling pathway
- OS hsa04622 RIG-I-like receptor signaling pathway
- OS hsa04623 Cytosolic DNA-sensing pathway
- OS hsa04625 C-type lectin receptor signaling pathway
- OS hsa04650 Natural killer cell mediated cytotoxicity
- OS hsa04612 Antigen processing and presentation
- OS hsa04660 T cell receptor signaling pathway
- OS hsa04658 Th1 and Th2 cell differentiation
- OS hsa04659 Th17 cell differentiation
- OS hsa04657 IL-17 signaling pathway
- OS hsa04662 B cell receptor signaling pathway
- OS hsa04664 Fc epsilon RI signaling pathway
- OS hsa04666 Fc gamma R-mediated phagocytosis
- OS hsa04670 Leukocyte transendothelial migration
- OS hsa04672 Intestinal immune network for IgA production
- OS hsa04062 Chemokine signaling pathway
- OS hsa04910 Insulin signaling pathway
- OS hsa04920 Adipocytokine signaling pathway
- OS hsa03320 PPAR signaling pathway
- OS hsa04912 GnRH signaling pathway
- OS hsa04915 Estrogen signaling pathway
- OS hsa04914 Progesterone-mediated oocyte maturation
- OS hsa04917 Prolactin signaling pathway
- OS hsa04921 Oxytocin signaling pathway
- OS hsa04926 Relaxin signaling pathway
- OS hsa04935 Growth hormone synthesis, secretion and action
- OS hsa04928 Parathyroid hormone synthesis, secretion and action
- OS hsa04925 Aldosterone synthesis and secretion
- OS hsa04261 Adrenergic signaling in cardiomyocytes
- OS hsa04270 Vascular smooth muscle contraction
- OS hsa04971 Gastric acid secretion
- OS hsa04978 Mineral absorption
- OS hsa04726 Serotonergic synapse
- OS hsa04722 Neurotrophin signaling pathway
- OS hsa04750 Inflammatory mediator regulation of TRP channels
- OS hsa04380 Osteoclast differentiation
- OS hsa04713 Circadian entrainment
- OS hsa04714 Thermogenesis
- HD hsa05200 Pathways in cancer
- HD hsa05202 Transcriptional misregulation in cancer
- HD hsa05203 Viral carcinogenesis
- HD hsa05216 Thyroid cancer
- HD hsa05221 Acute myeloid leukemia
- HD hsa05220 Chronic myeloid leukemia
- HD hsa05310 Asthma
- HD hsa05322 Systemic lupus erythematosus
- HD hsa05323 Rheumatoid arthritis
- HD hsa05320 Autoimmune thyroid disease
- HD hsa05321 Inflammatory bowel disease
- HD hsa05330 Allograft rejection
- HD hsa05332 Graft-versus-host disease
- HD hsa05340 Primary immunodeficiency
- HD hsa05010 Alzheimer disease
- HD hsa05012 Parkinson disease
- HD hsa05014 Amyotrophic lateral sclerosis
- HD hsa05016 Huntington disease
- HD hsa05020 Prion disease
- HD hsa05032 Morphine addiction
- HD hsa05034 Alcoholism
- HD hsa05418 Fluid shear stress and atherosclerosis
- HD hsa05416 Viral myocarditis
- HD hsa04930 Type II diabetes mellitus
- HD hsa04940 Type I diabetes mellitus
- HD hsa04932 Non-alcoholic fatty liver disease
- HD hsa04931 Insulin resistance
- HD hsa05120 Epithelial cell signaling in Helicobacter pylori infection
- HD hsa05130 Pathogenic Escherichia coli infection
- HD hsa05132 Salmonella infection
- HD hsa05131 Shigellosis
- HD hsa05135 Yersinia infection
- HD hsa05133 Pertussis
- HD hsa05134 Legionellosis
- HD hsa05150 Staphylococcus aureus infection
- HD hsa05152 Tuberculosis
- HD hsa05166 Human T-cell leukemia virus 1 infection
- HD hsa05170 Human immunodeficiency virus 1 infection
- HD hsa05162 Measles
- HD hsa05164 Influenza A
- HD hsa05161 Hepatitis B
- HD hsa05160 Hepatitis C
- HD hsa05168 Herpes simplex virus 1 infection
- HD hsa05163 Human cytomegalovirus infection
- HD hsa05167 Kaposi sarcoma-associated herpesvirus infection
- HD hsa05169 Epstein-Barr virus infection
- HD hsa05146 Amoebiasis
- HD hsa05144 Malaria
- HD hsa05145 Toxoplasmosis
- HD hsa05140 Leishmaniasis
- HD hsa05142 Chagas disease
- HD hsa05143 African trypanosomiasis

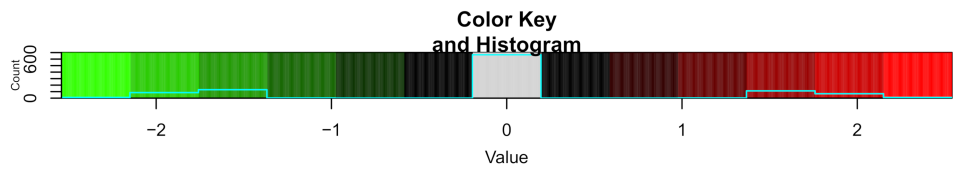

Supplement: Image_2.pdf [file Image_2.pdf]
