# Supplementary material for: Transcriptomic Signature Differences Between SARS-CoV-2 and Influenza Virus Infected Patients
Source: PubMed Central journal article supplement (PMC8202013; doi:10.3389/fimmu.2021.666163), 2021-05-31

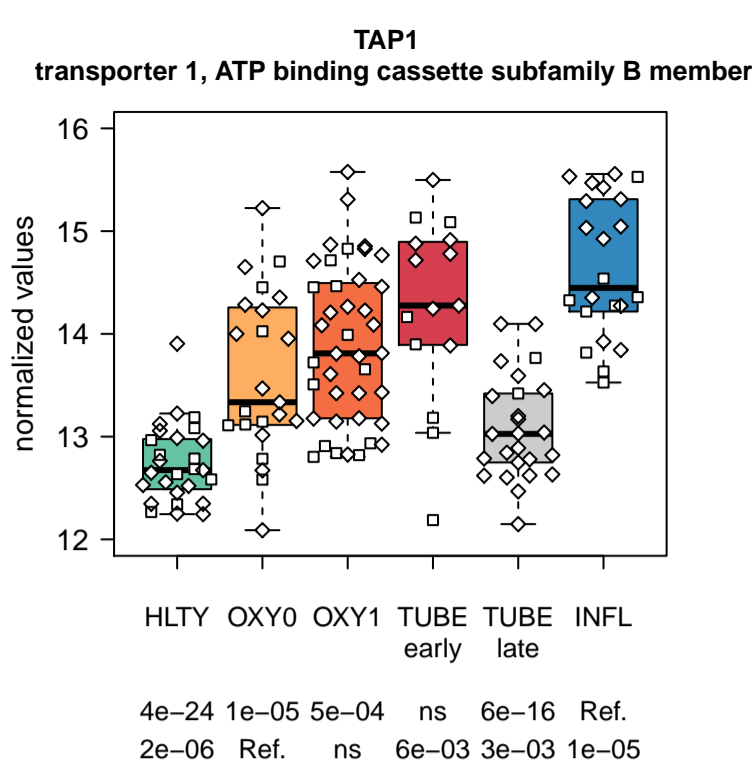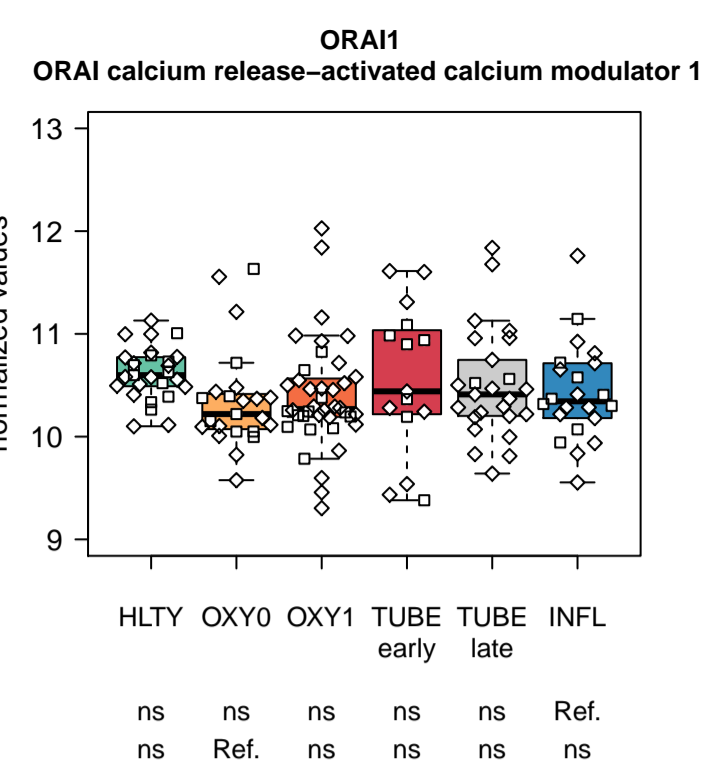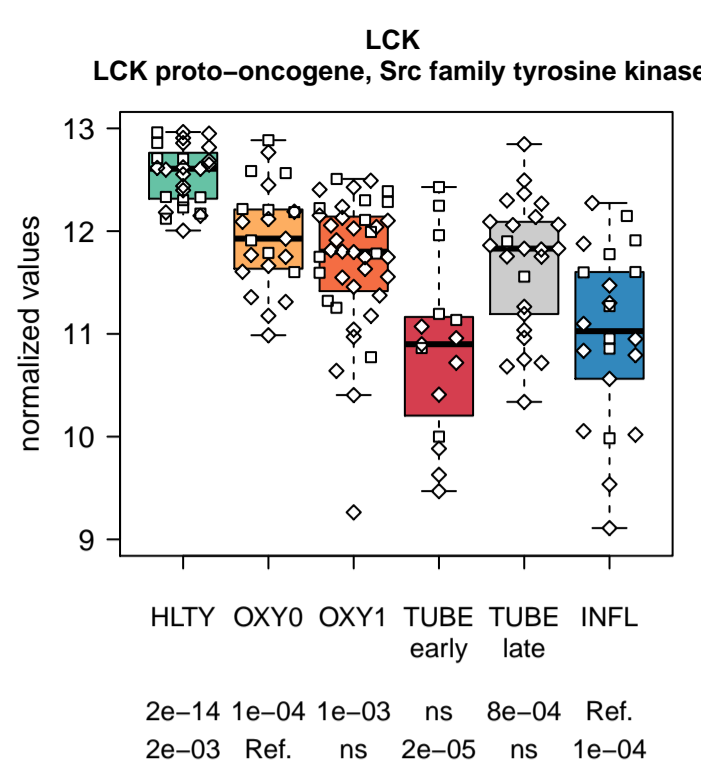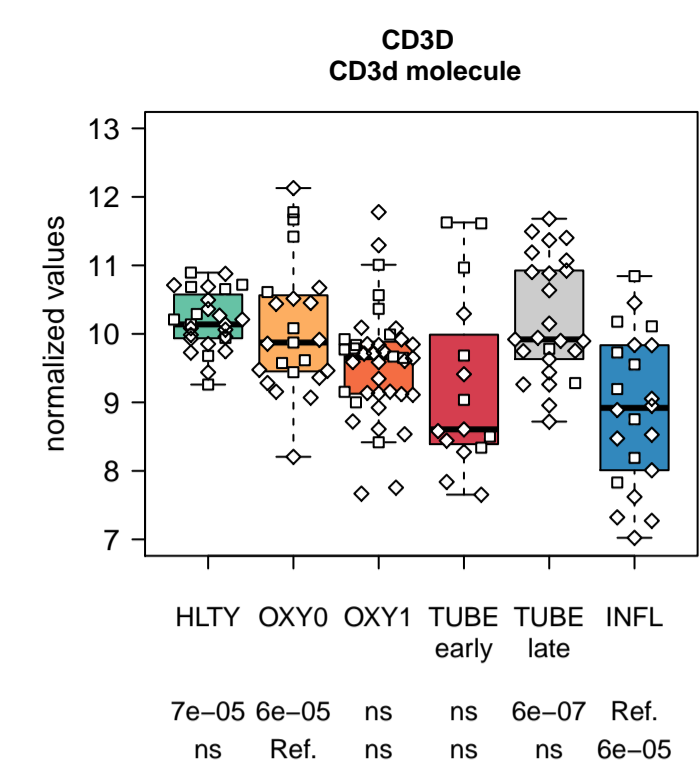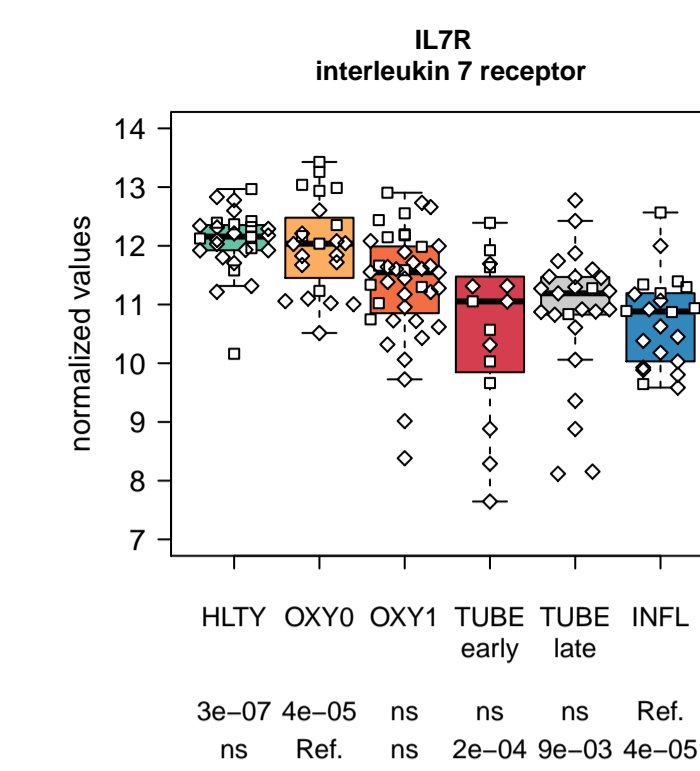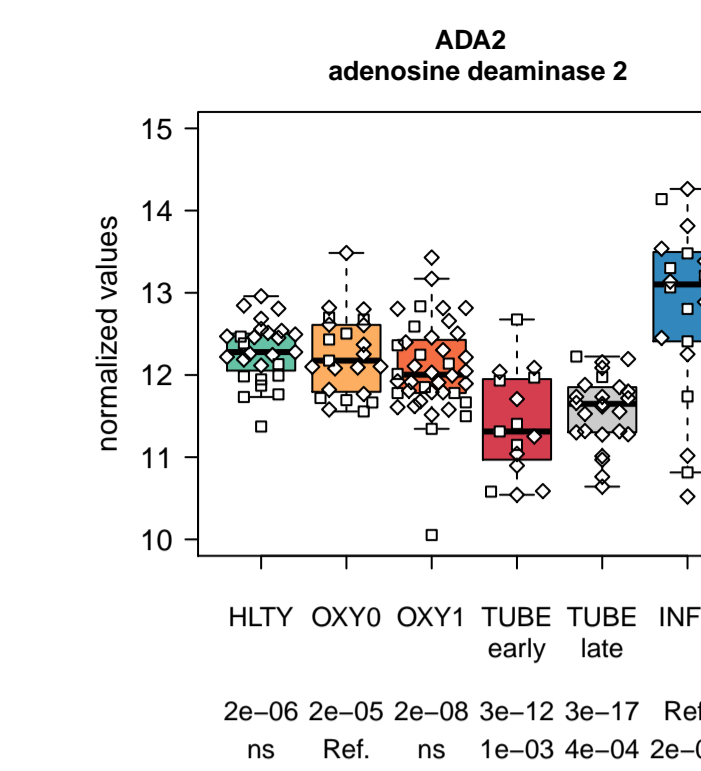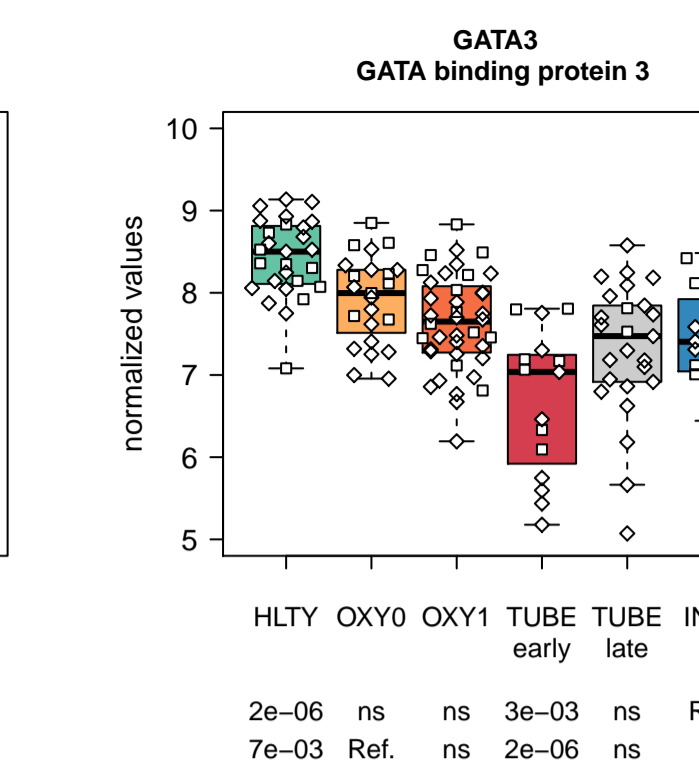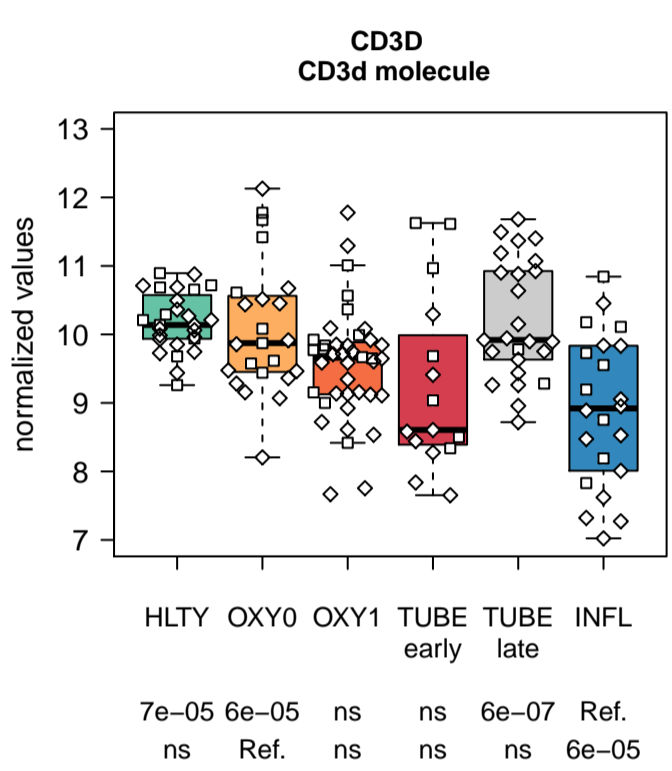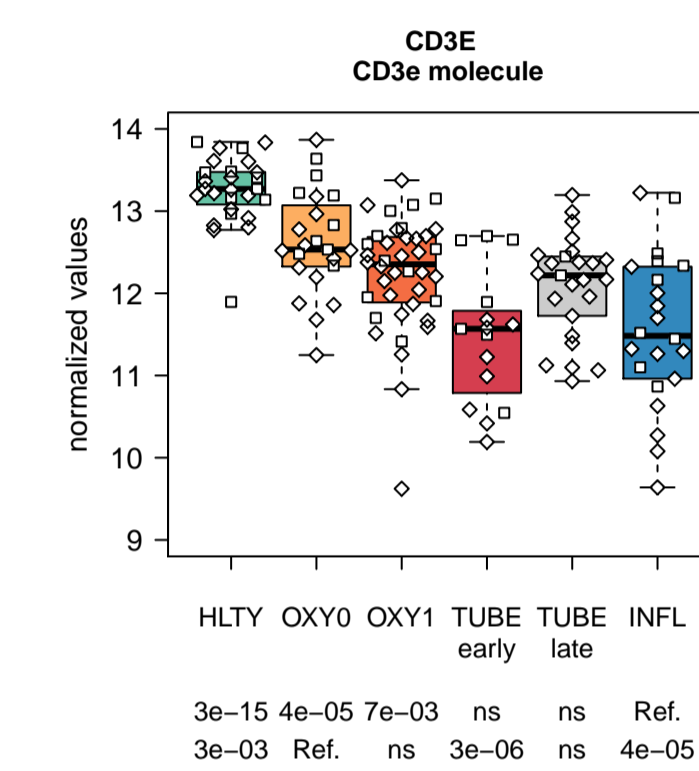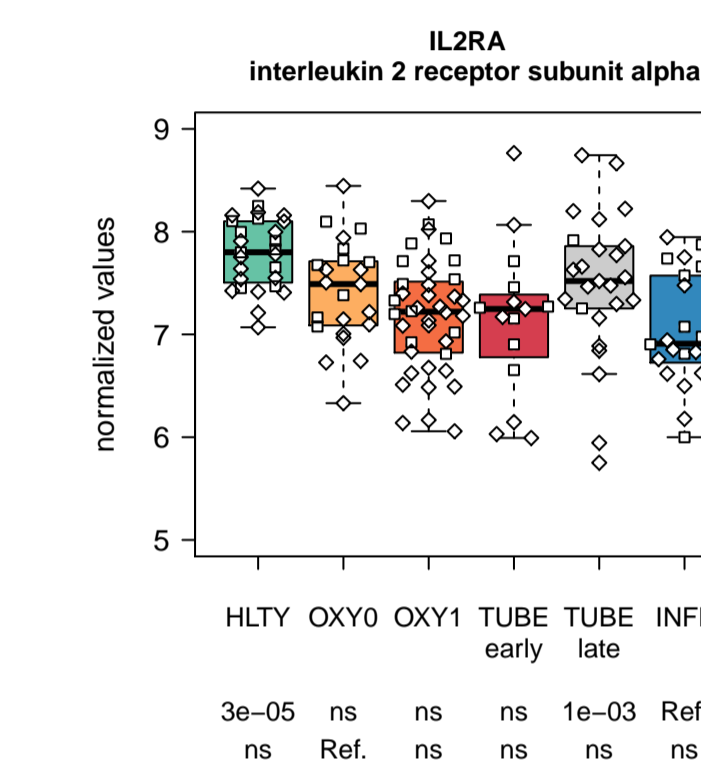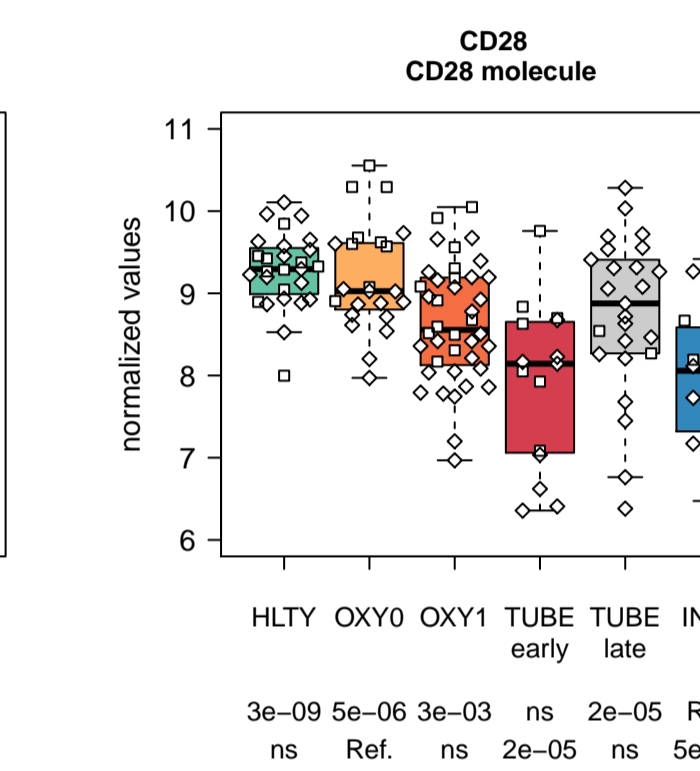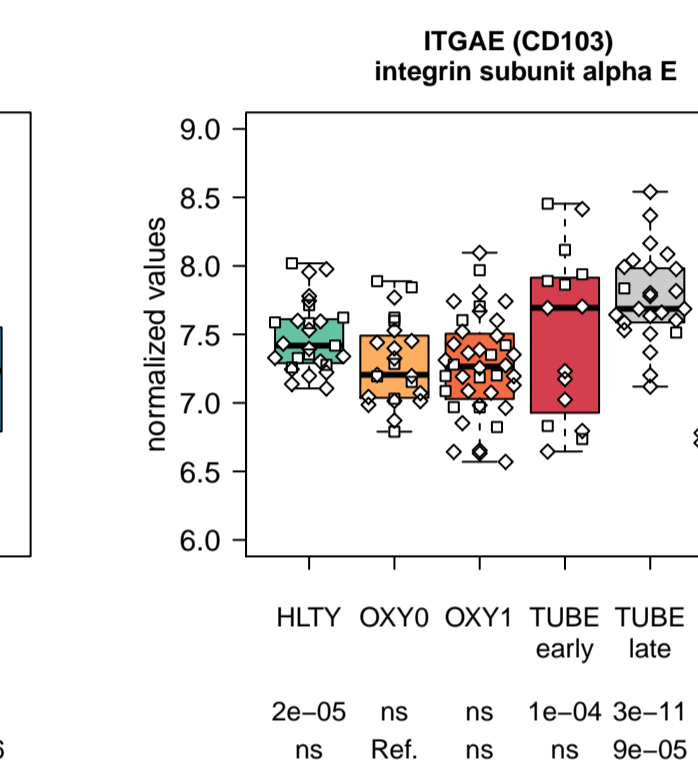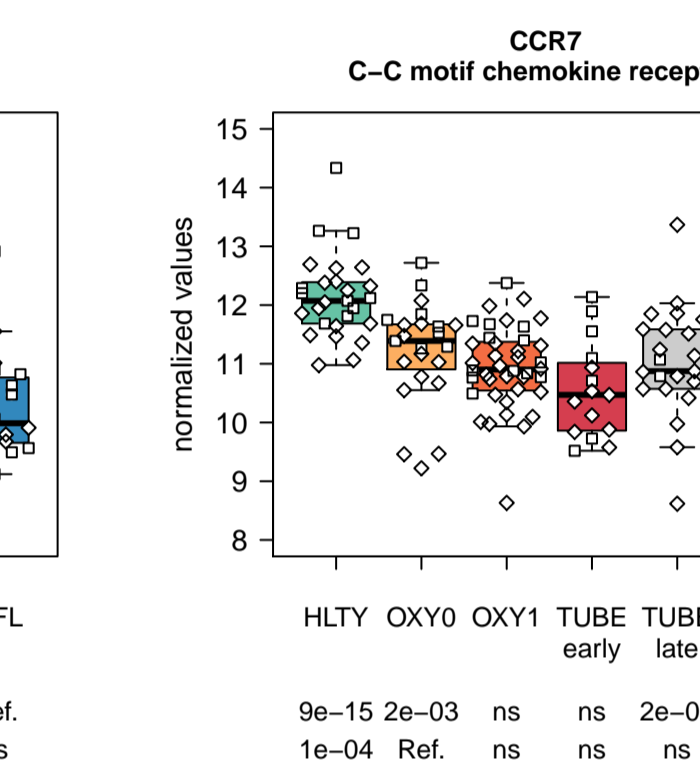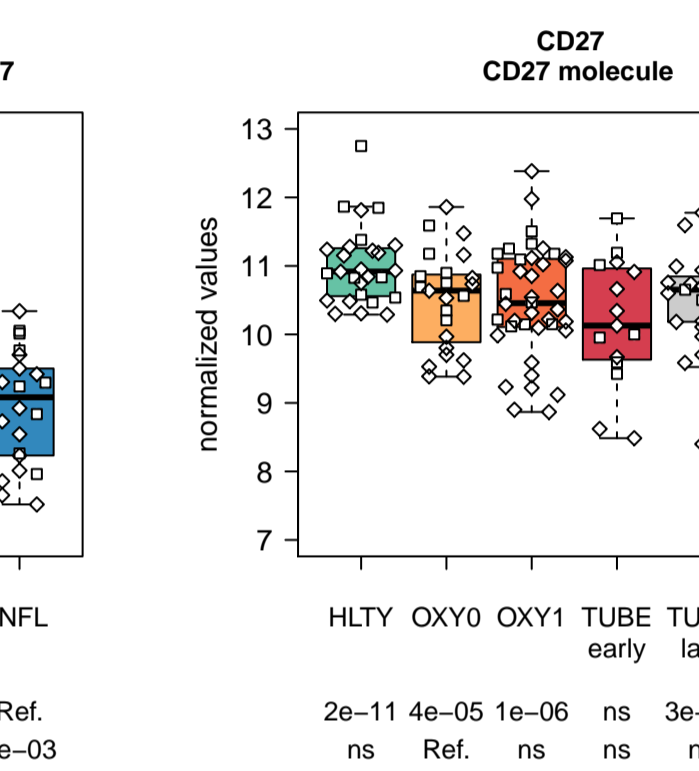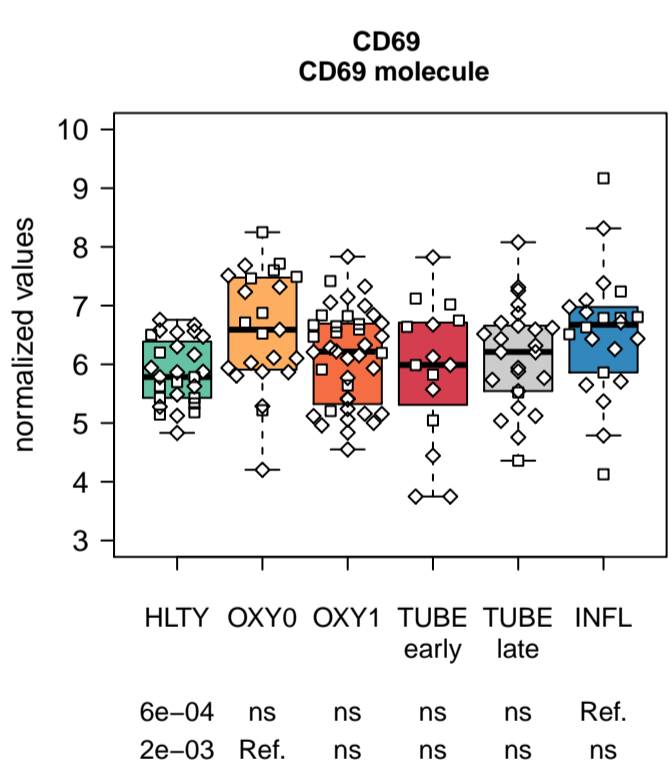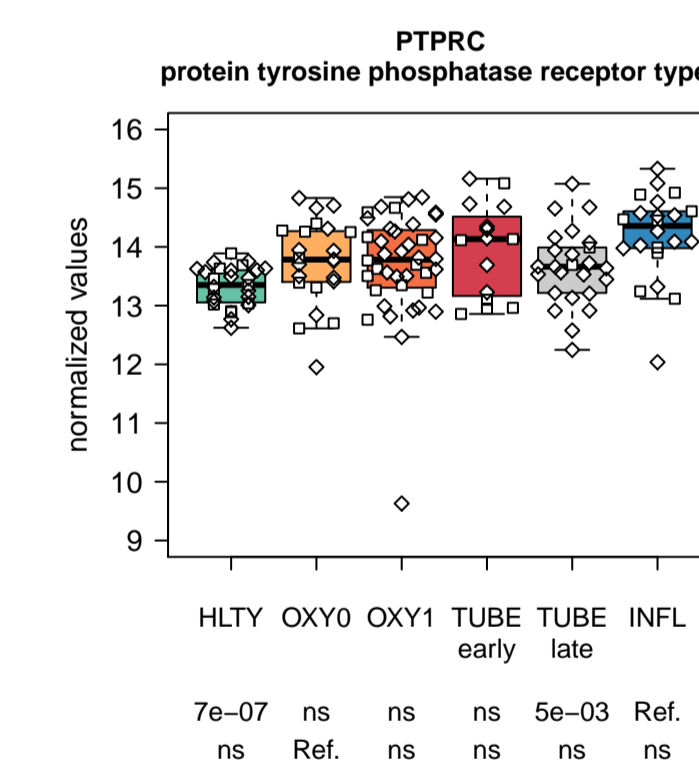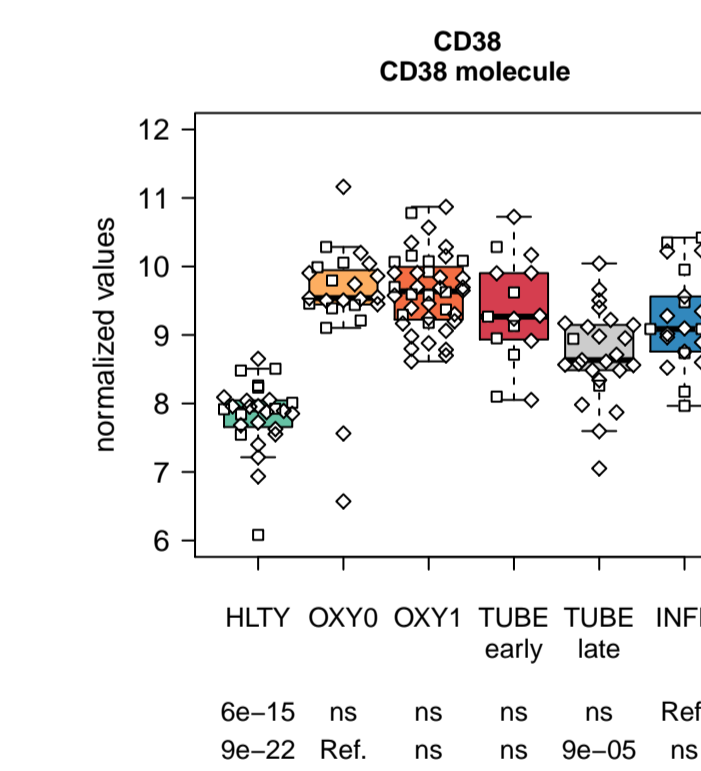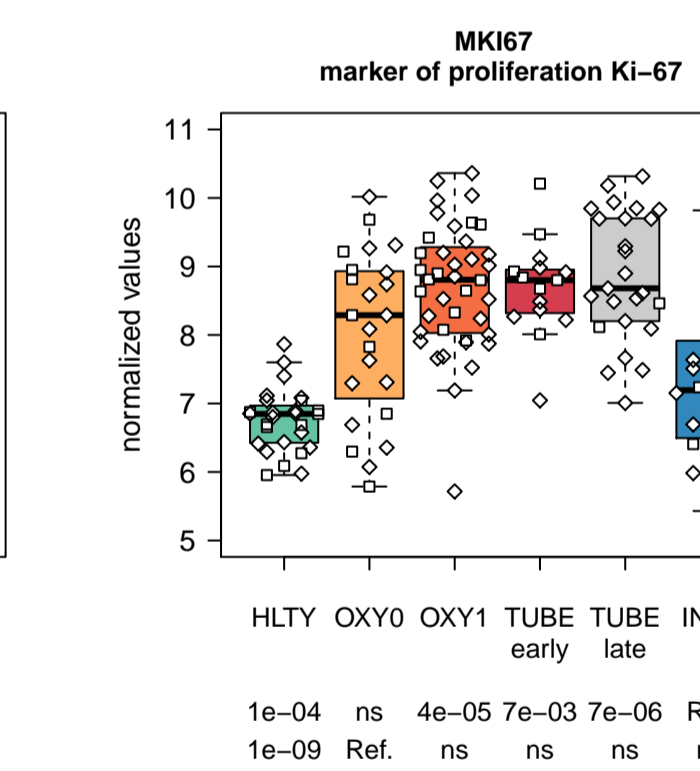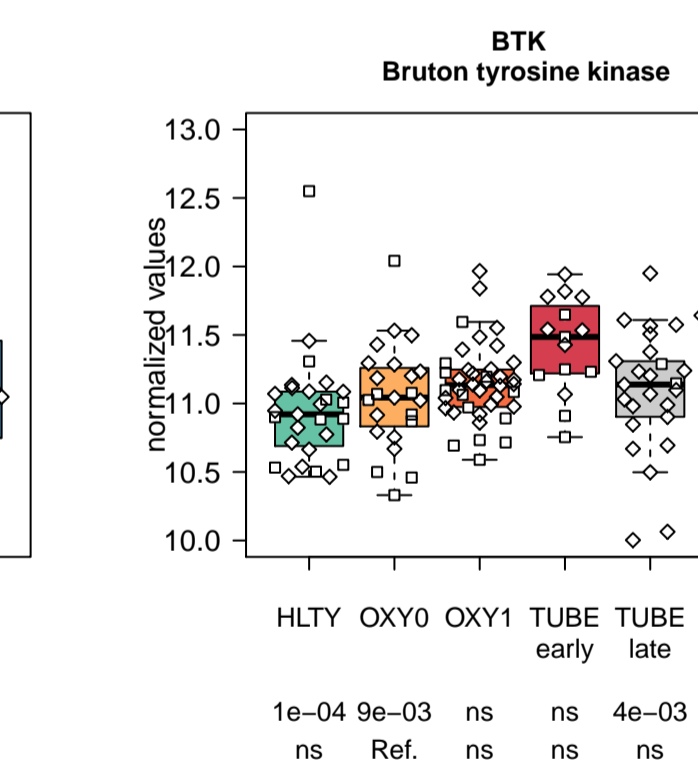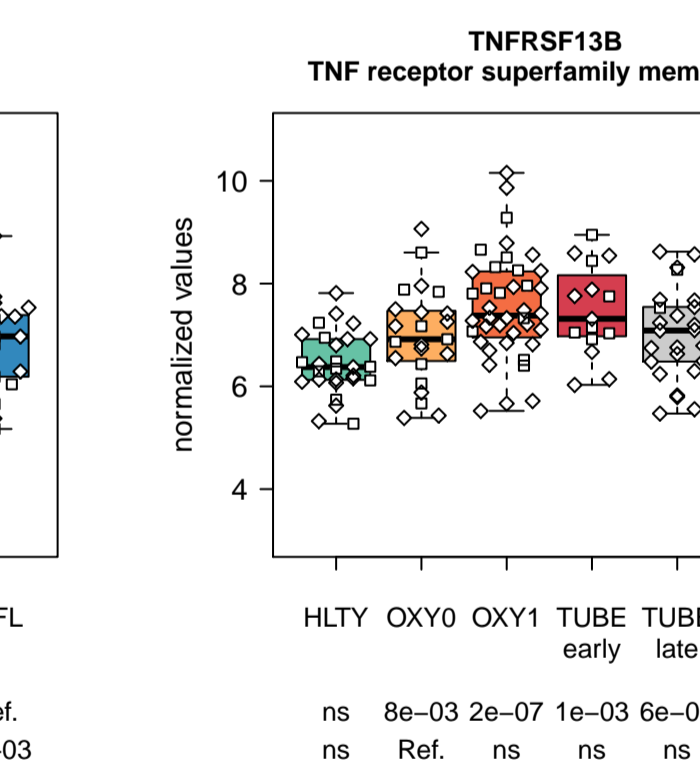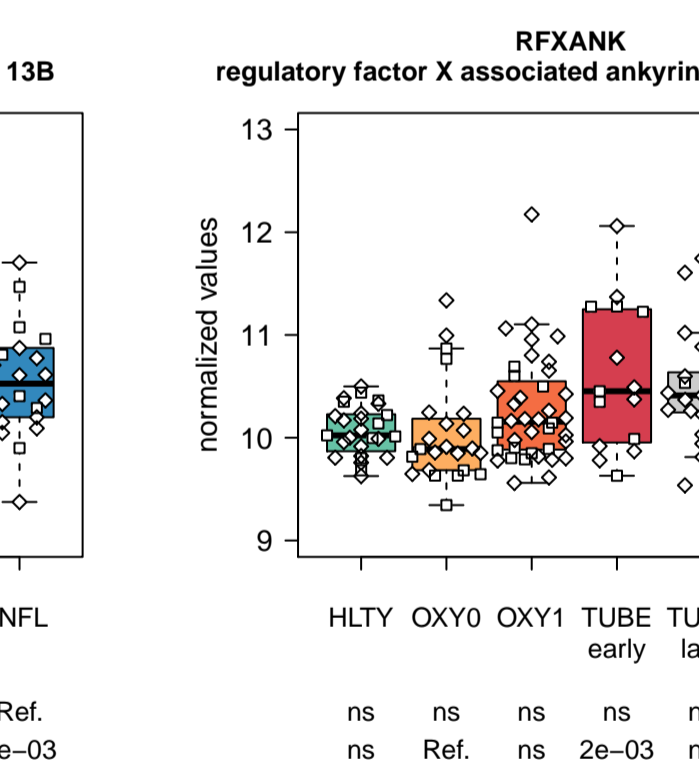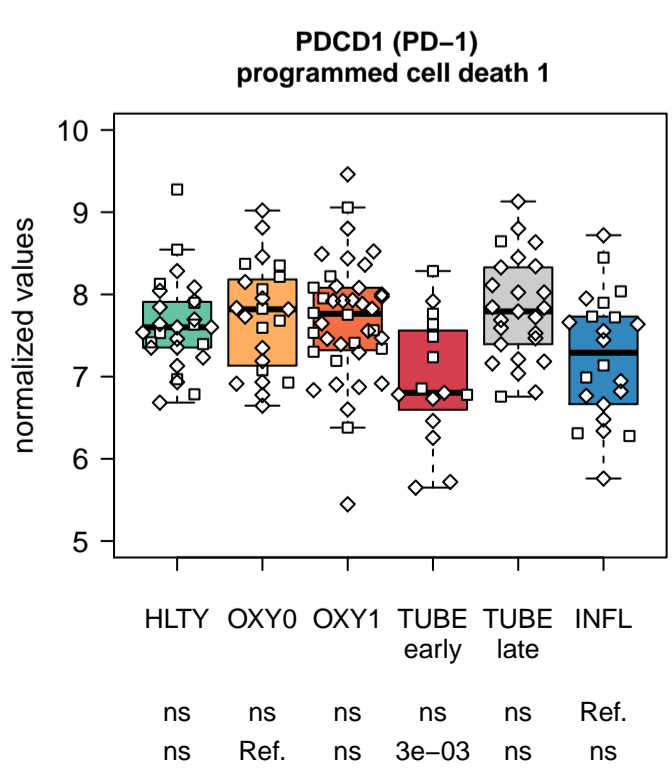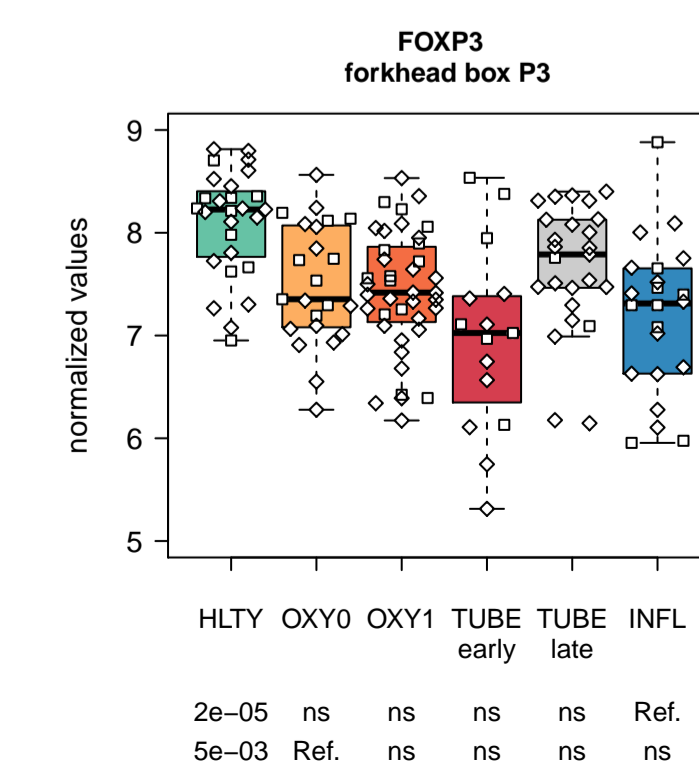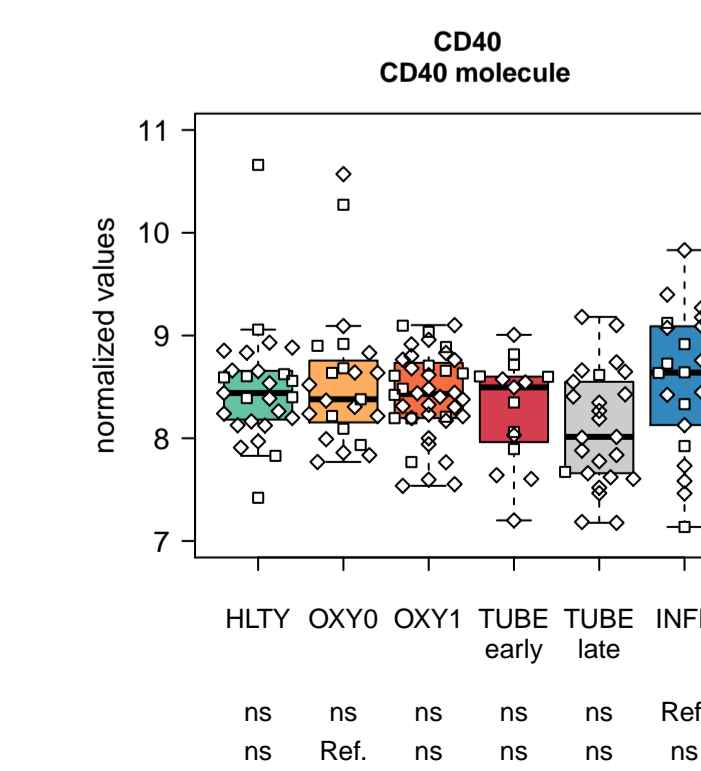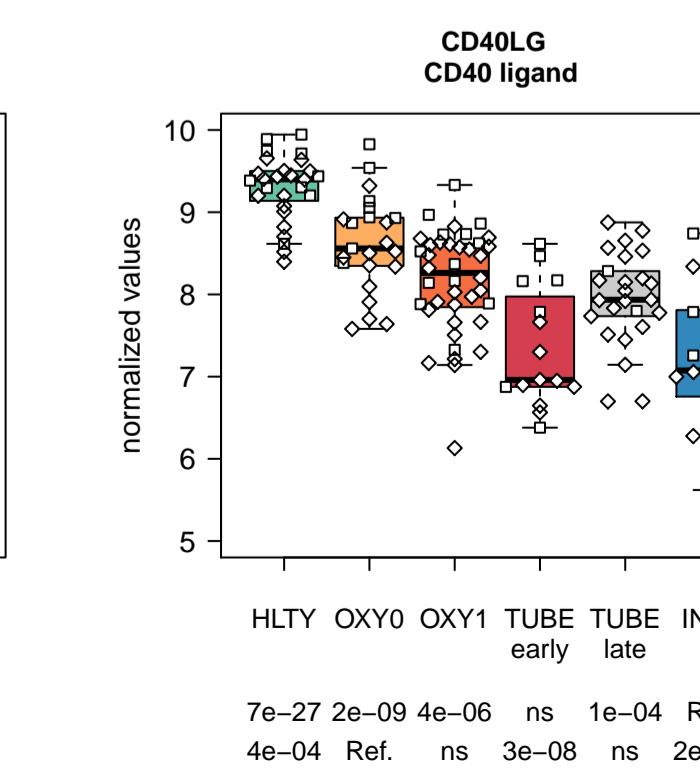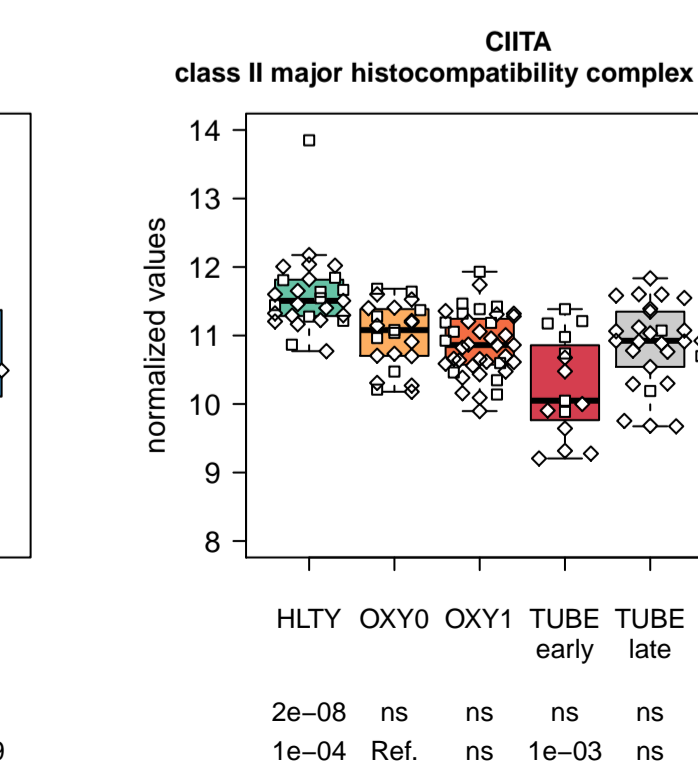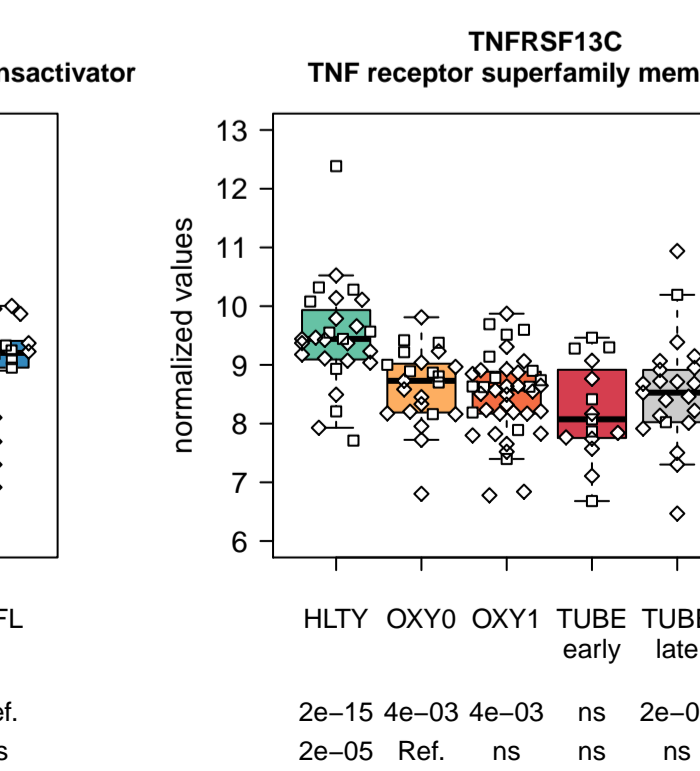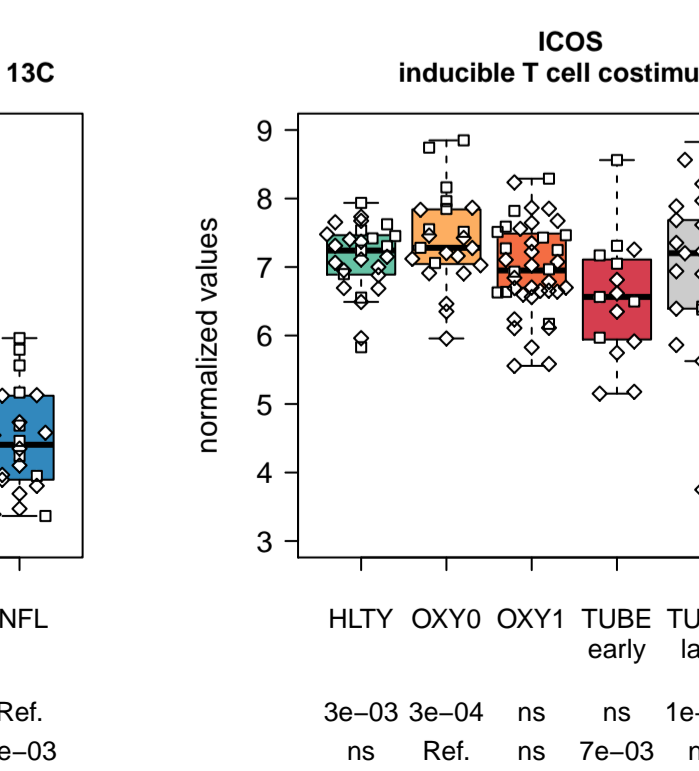

Supplement: Image_7.pdf [file Image_7.pdf]
