# Supplementary material for: Transcriptomic Signature Differences Between SARS-CoV-2 and Influenza Virus Infected Patients
Source: PubMed Central journal article supplement (PMC8202013; doi:10.3389/fimmu.2021.666163), 2021-05-31

Usabe lib\_sizes (colored) ; Hemoglobin (in brown)

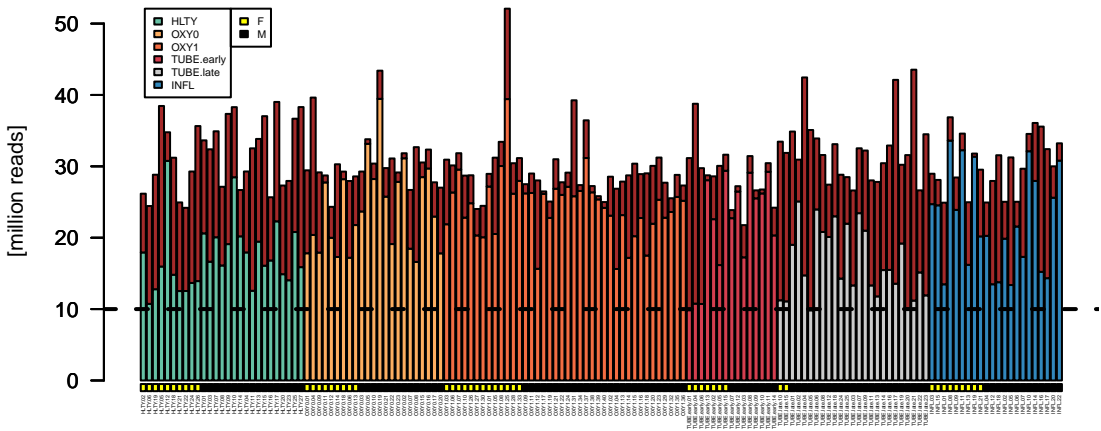

Usable Library Size

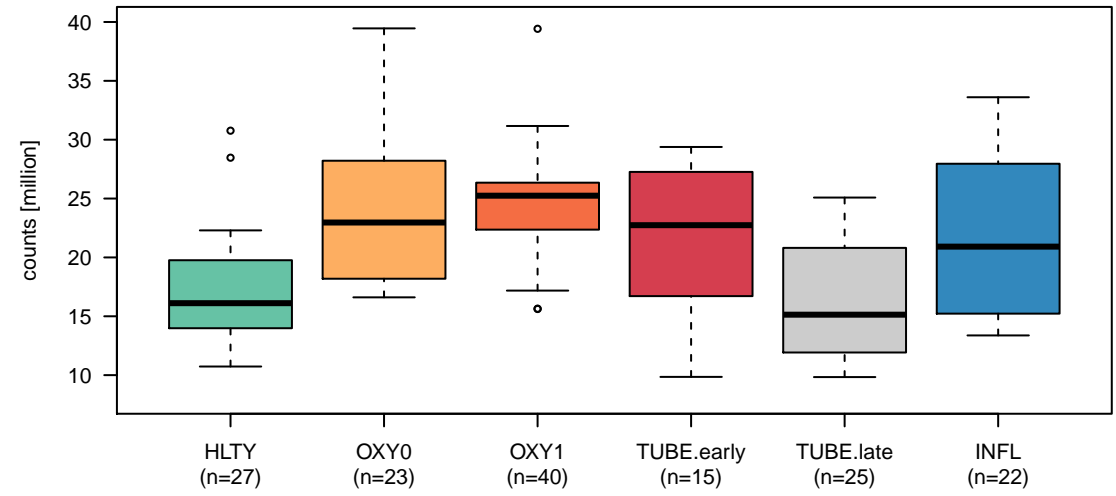

delta\_admission

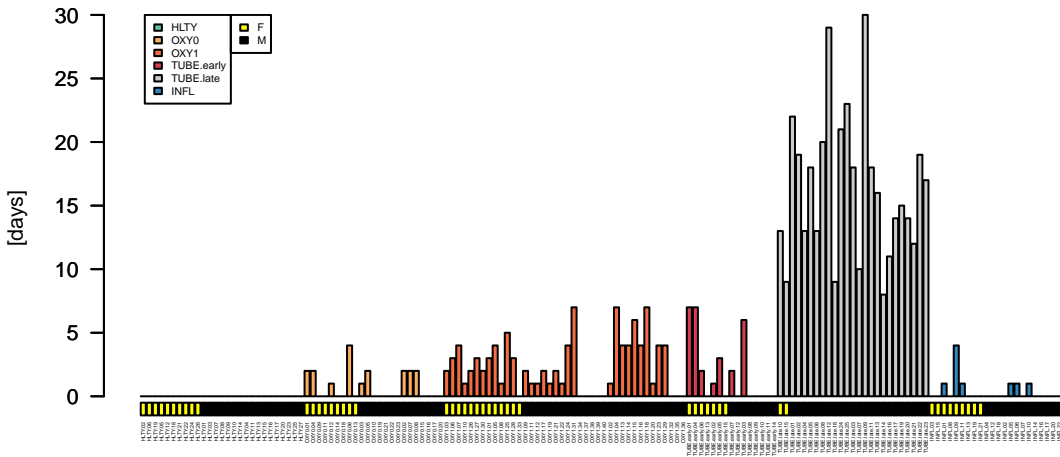

RPS4Y1  
ribosomal protein S4 Y-linked 1 [Source:HGNC Symbol;Acc:HGNC:10425]

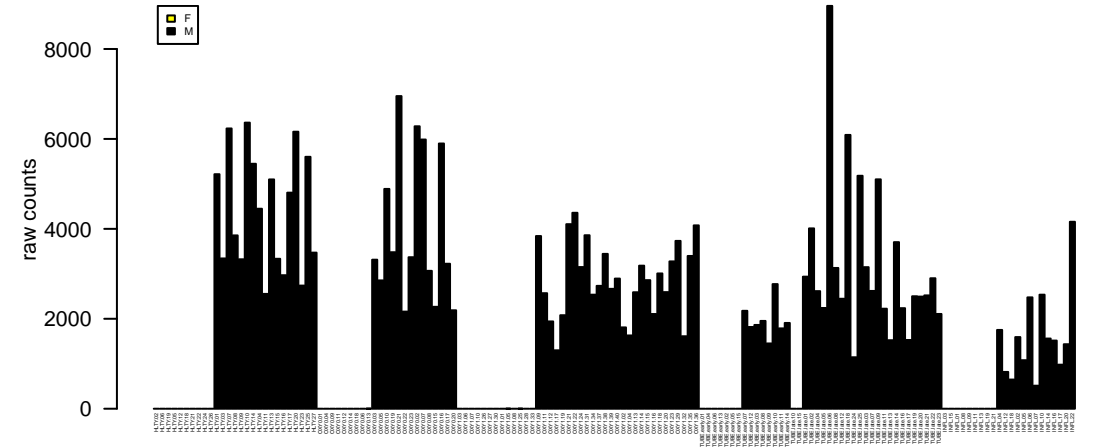

delta\_symptoms

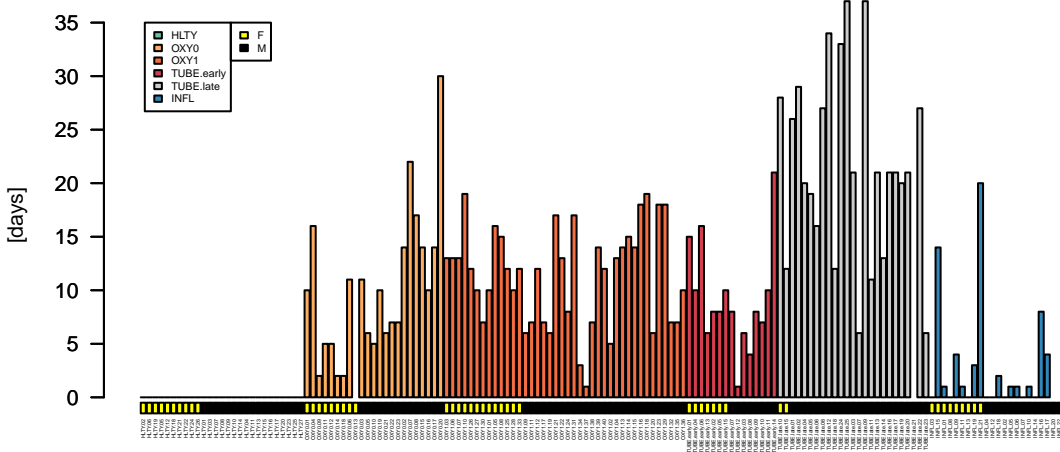

XIST  
X inactive specific transcript [Source:HGNC Symbol;Acc:HGNC:12810]

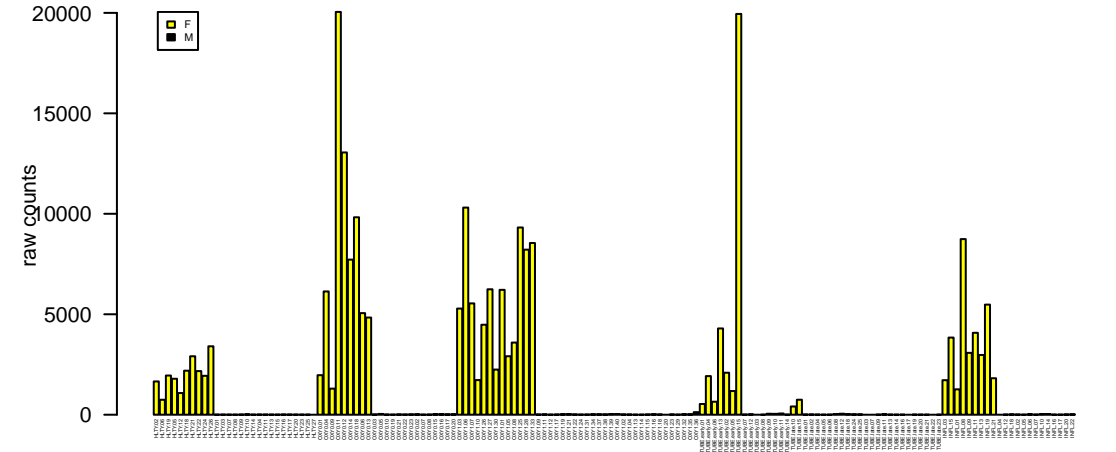

Supplement: Image_1.pdf [file Image_1.pdf]
