# Supplementary material for: Transcriptomic Signature Differences Between SARS-CoV-2 and Influenza Virus Infected Patients
Source: PubMed Central journal article supplement (PMC8202013; doi:10.3389/fimmu.2021.666163), 2021-05-31

**UNC93B1**

unc-93 homolog B1, TLR signaling regulator

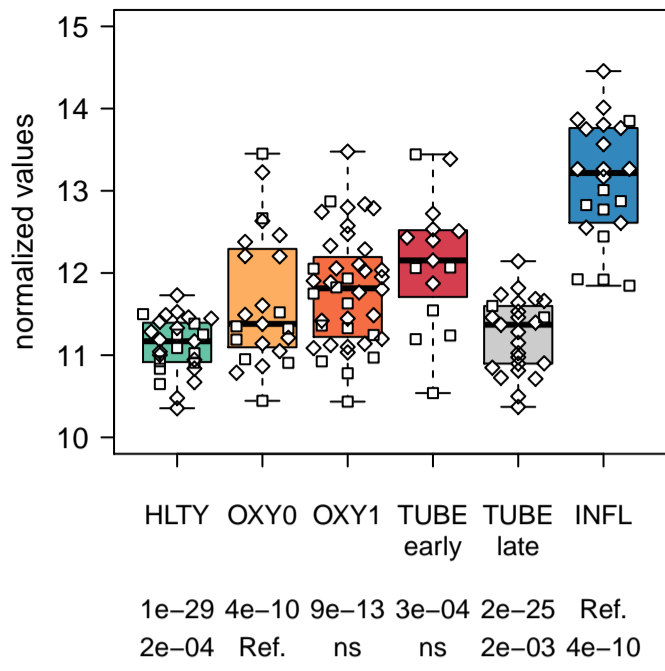**IRF7**

interferon regulatory factor 7

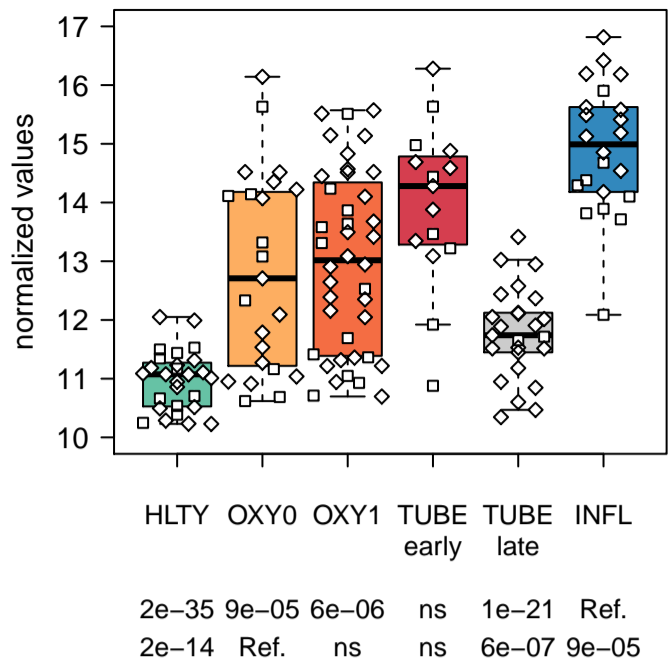**CD40LG**

CD40 ligand

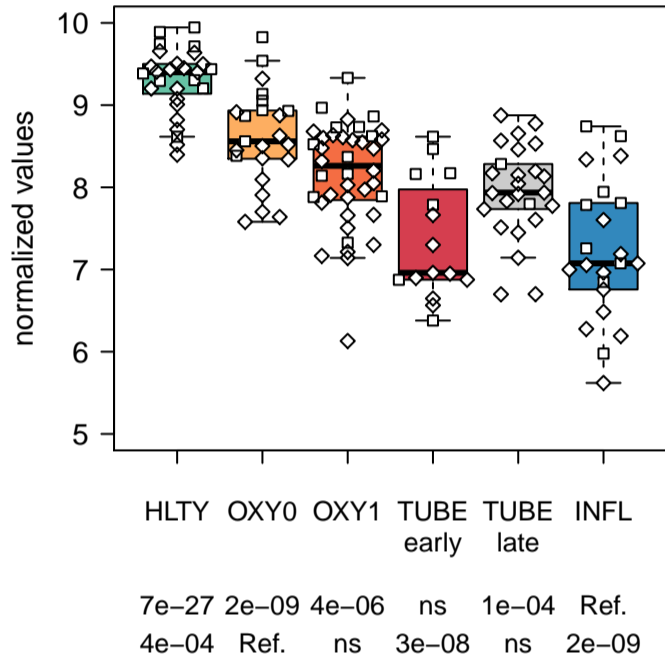**CD8B**

CD8b molecule

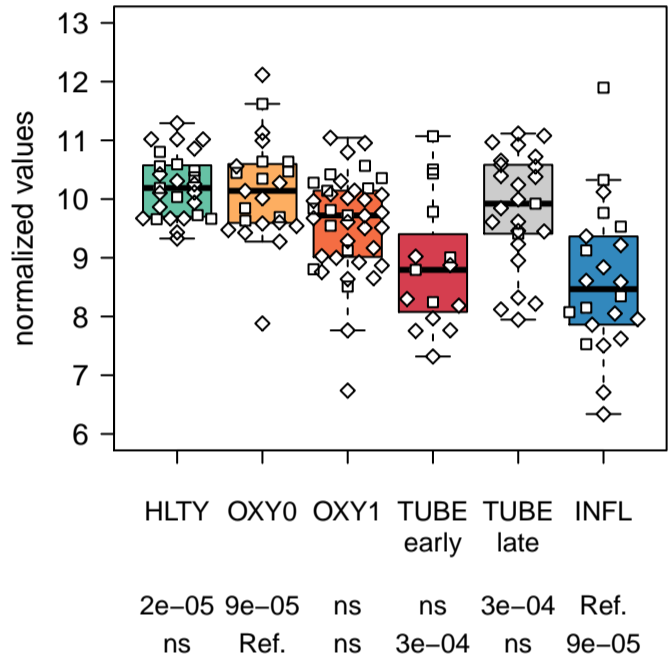**GGH**

gamma-glutamyl hydrolase

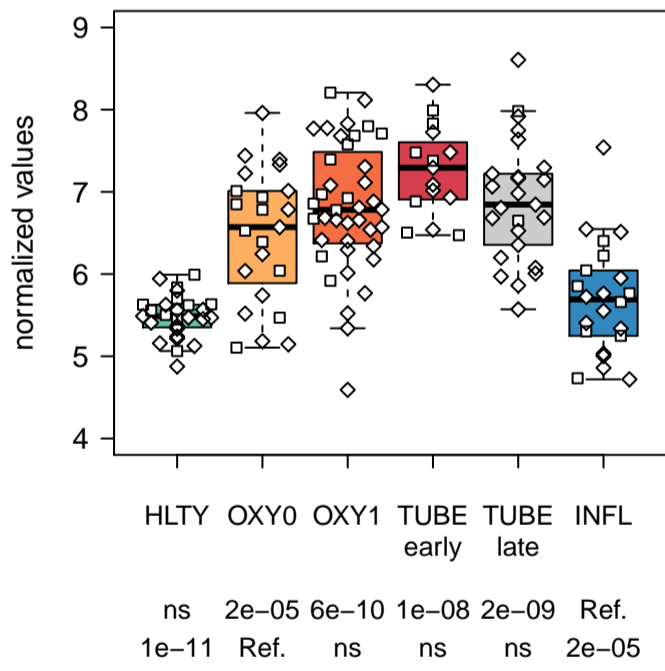**JCHAIN**

joining chain of multimeric IgA and IgM

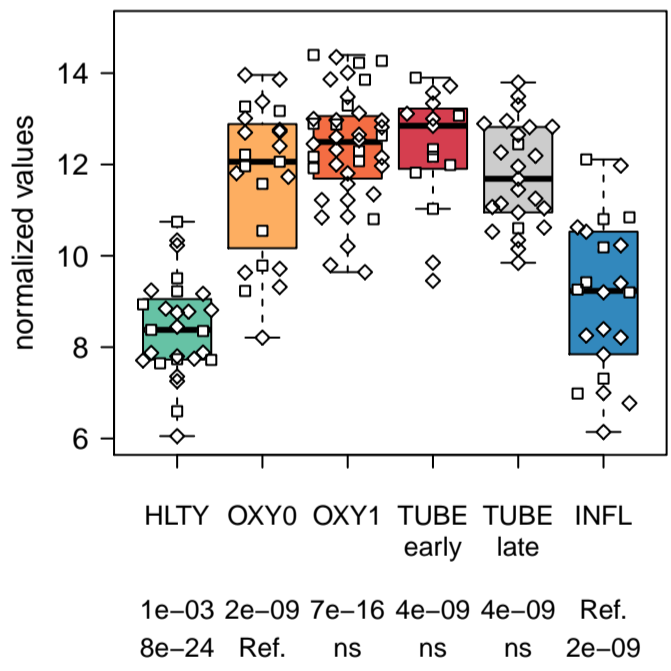**TBX21**

T-box transcription factor 21

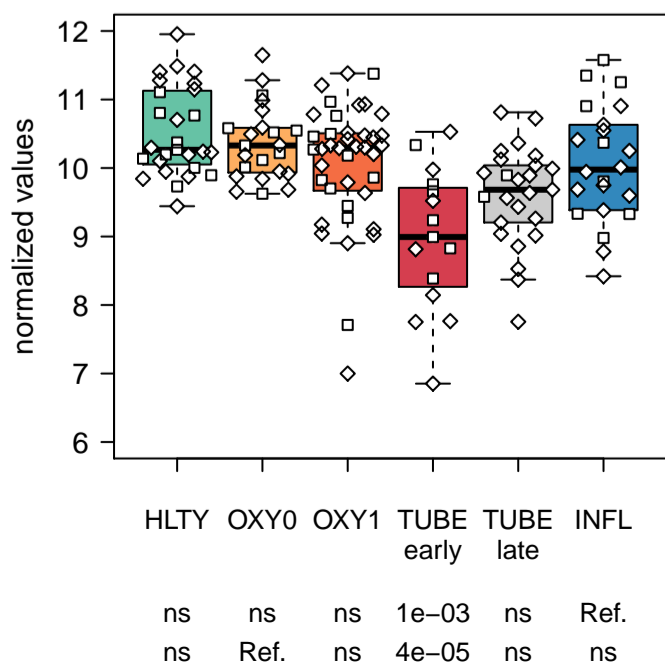**PRF1**

perforin 1

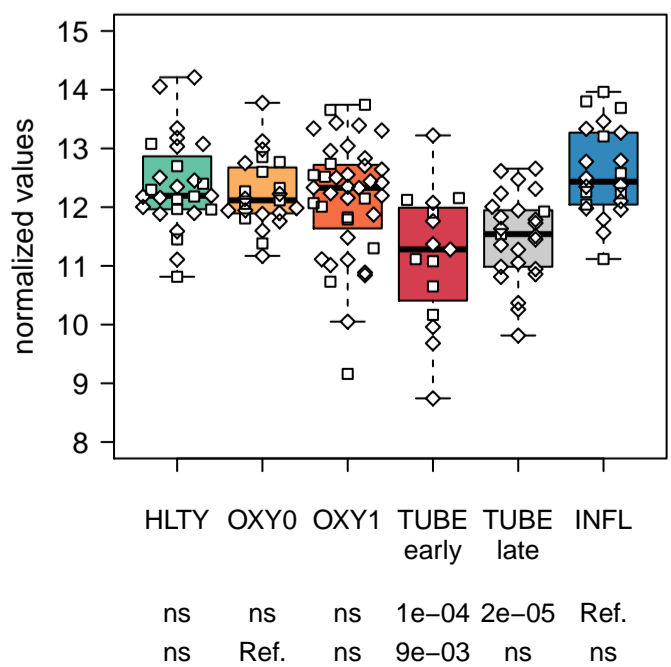

Supplement: Image_3.pdf [file Image_3.pdf]
