# Supplementary material for: Transcriptomic Signature Differences Between SARS-CoV-2 and Influenza Virus Infected Patients
Source: PubMed Central journal article supplement (PMC8202013; doi:10.3389/fimmu.2021.666163), 2021-05-31
Supplement: Image_13.pdf [file Image_13.pdf]

**CD79A**  
CD79a molecule

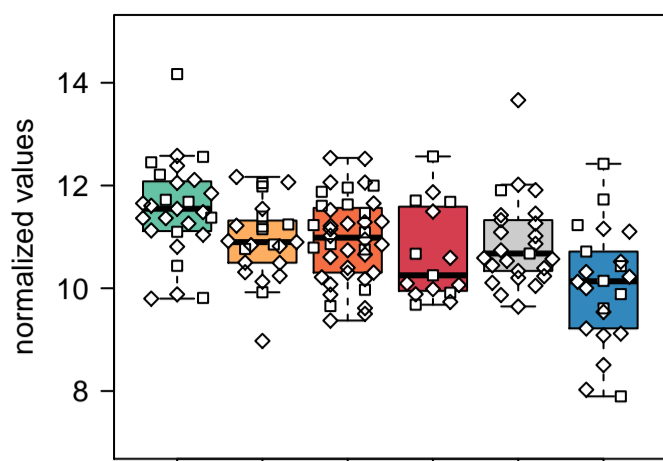

HLTY OXY0 OXY1 TUBE TUBE INFL  
early late  
1e-07 ns 6e-03 ns 1e-03 Ref.  
ns Ref. ns ns ns ns

**BLNK**  
B cell linker

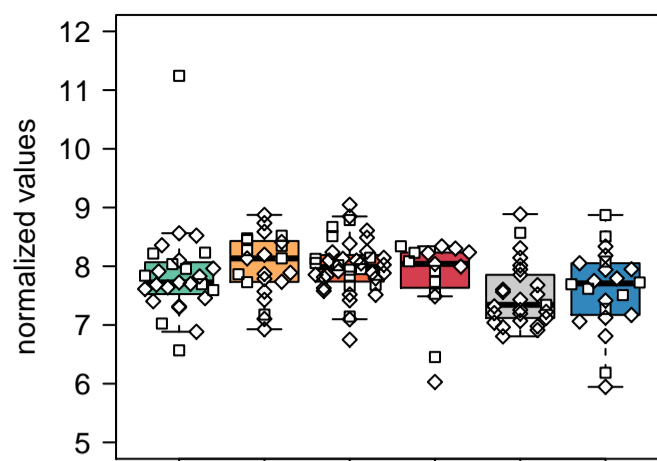

HLTY OXY0 OXY1 TUBE TUBE INFL  
early late  
ns ns ns ns ns Ref.  
ns Ref. ns ns ns ns

**UNG**  
uracil DNA glycosylase

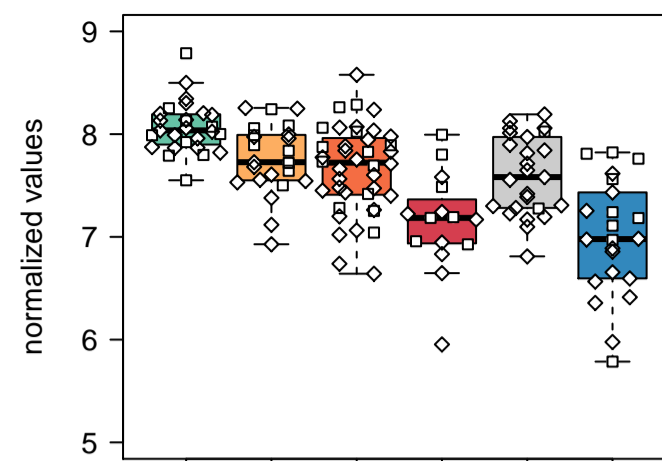

HLTY OXY0 OXY1 TUBE TUBE INFL  
early late  
8e-17 2e-07 1e-07 ns 2e-06 Ref.  
ns Ref. ns 9e-05 ns 2e-07

**CD19**  
CD19 molecule

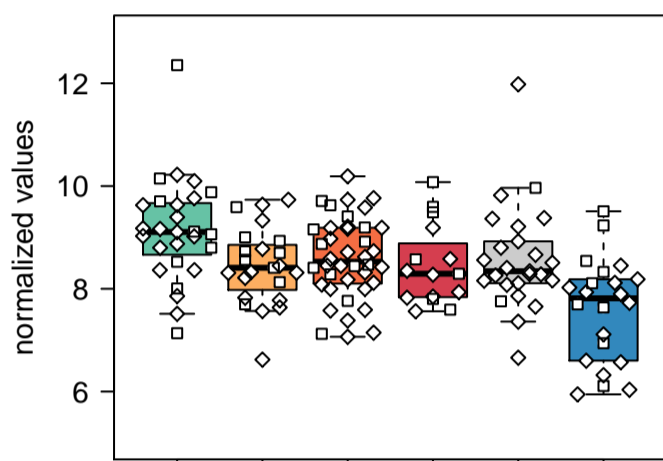

HLTY OXY0 OXY1 TUBE TUBE INFL  
early late  
1e-09 ns 8e-04 ns 4e-06 Ref.  
2e-03 Ref. ns ns ns ns

**IL2RB**  
interleukin 2 receptor subunit beta

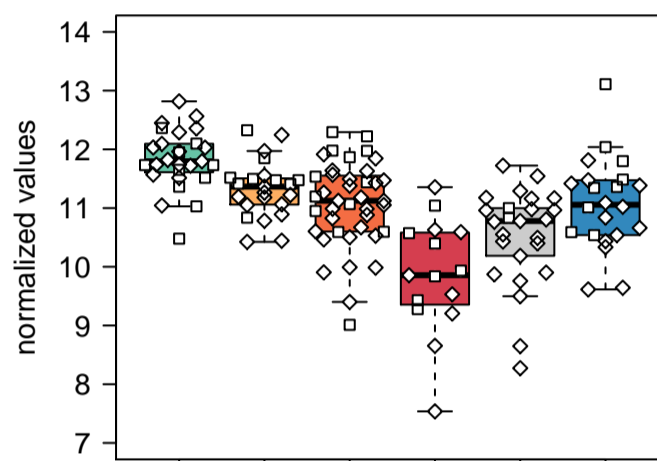

HLTY OXY0 OXY1 TUBE TUBE INFL  
early late  
1e-03 ns ns 2e-05 ns Ref.  
ns Ref. ns 8e-07 ns ns

**CD3E**  
CD3e molecule

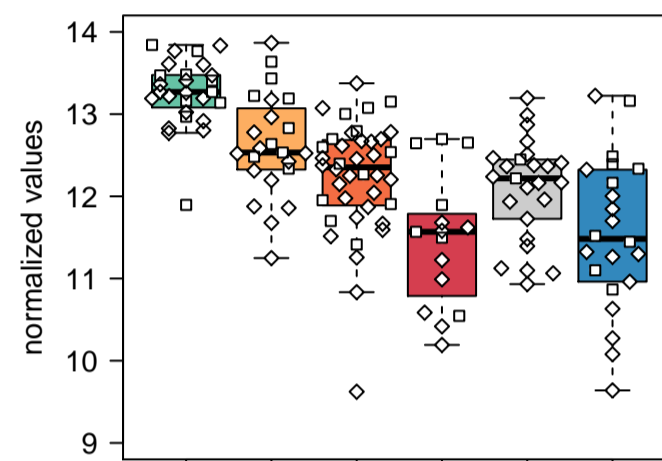

HLTY OXY0 OXY1 TUBE TUBE INFL  
early late  
3e-15 4e-05 7e-03 ns ns Ref.  
3e-03 Ref. ns 3e-06 ns 4e-05

**TAP2**  
transporter 2, ATP binding cassette subfamily B member

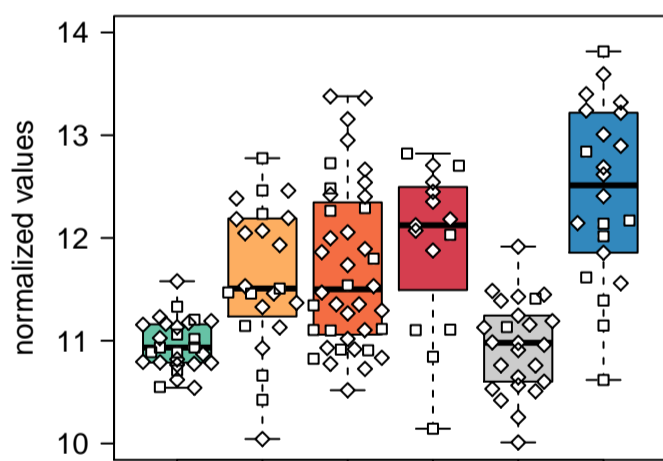

HLTY OXY0 OXY1 TUBE TUBE INFL  
early late  
5e-18 5e-05 2e-04 ns 1e-16 Ref.  
2e-04 Ref. ns ns 4e-04 5e-05

**CD8A**  
CD8a molecule

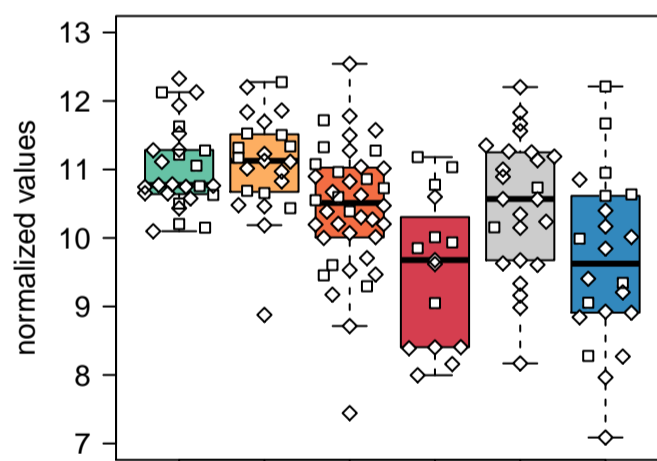

HLTY OXY0 OXY1 TUBE TUBE INFL  
early late  
1e-04 4e-04 ns ns 9e-03 Ref.  
ns Ref. ns 2e-05 ns 4e-04

**ZAP70**  
zeta chain of T cell receptor associated protein kinase 70

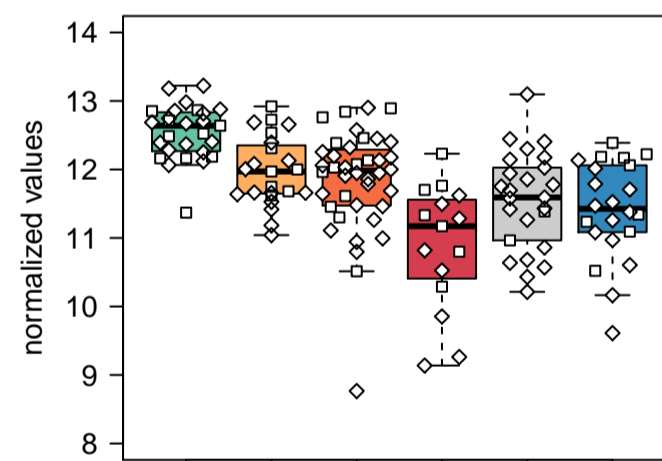

HLTY OXY0 OXY1 TUBE TUBE INFL  
early late  
4e-08 ns ns ns ns Ref.  
5e-03 Ref. ns 8e-05 ns ns

**ORAI2**  
ORAI calcium release-activated calcium modulator 2

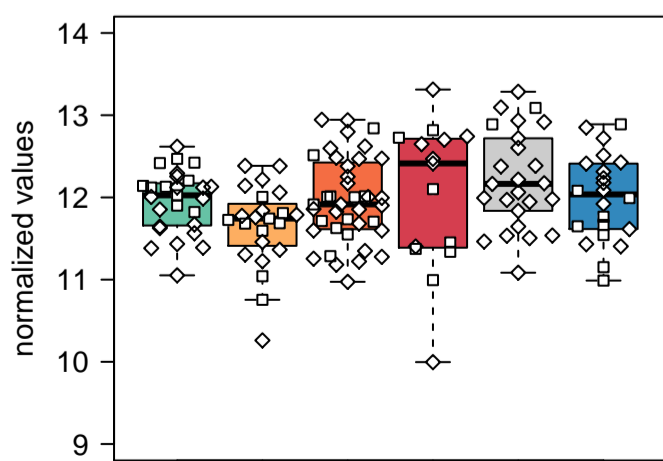

HLTY OXY0 OXY1 TUBE TUBE INFL  
early late  
ns ns ns ns ns Ref.  
ns Ref. ns ns 2e-03 ns
