# Supplementary material for: Transcriptomic Signature Differences Between SARS-CoV-2 and Influenza Virus Infected Patients
Source: PubMed Central journal article supplement (PMC8202013; doi:10.3389/fimmu.2021.666163), 2021-05-31
Supplement: Table_4.pdf [file Table_4.pdf]

Table\_S4.xlsx

| symbol | TUBE_INFL.log2FoldChange | TUBE_INFL.padj | TUBE_HLTY.log2FoldChange | TUBE_HLTY.padj | OXY1_INFL.log2FoldChange | OXY1_INFL.padj | OXY1_HLTY.log2FoldChange | OXY1_HLTY.padj | OXY0_INFL.log2FoldChange | OXY0_INFL.padj | OXY0_HLTY.log2FoldChange | OXY0_HLTY.padj |
|--------|--------------------------|----------------|--------------------------|----------------|--------------------------|----------------|--------------------------|----------------|--------------------------|----------------|--------------------------|----------------|
| HDAC6  | -0.46                    | 9.7E-06        | -0.56                    | 1.1E-09        | -0.30                    | 1.2E-04        | -0.39                    | 3.0E-08        | -0.36                    | 2.6E-05        | -0.45                    | 4.0E-08        |
| UNK    | -0.59                    | 8.0E-08        | -0.60                    | 3.3E-10        | -0.28                    | 1.2E-03        | -0.27                    | 2.3E-04        | -0.26                    | 4.9E-03        | -0.26                    | 3.1E-03        |
| ZNF384 | -0.30                    | 4.6E-04        | -0.26                    | 6.0E-04        | -0.22                    | 1.2E-03        | -0.16                    | 5.8E-03        | -0.40                    | 7.6E-08        | -0.34                    | 5.2E-07        |
| TGFBI  | -1.47                    | 6.3E-07        | -1.49                    | 7.5E-09        | -0.67                    | 2.2E-03        | -0.69                    | 5.3E-04        | -0.63                    | 7.2E-03        | -0.63                    | 5.1E-03        |
| UBAP2L | -0.42                    | 2.2E-04        | -0.41                    | 5.1E-05        | -0.25                    | 6.3E-03        | -0.23                    | 7.0E-03        | -0.31                    | 1.7E-03        | -0.28                    | 3.2E-03        |
| DIAPH1 | -0.43                    | 4.1E-03        | -0.46                    | 6.4E-04        | -0.33                    | 4.7E-03        | -0.33                    | 1.5E-03        | -0.41                    | 1.2E-03        | -0.40                    | 7.8E-04        |

Table\_S4.xlsx

| symbol   | TUBE_INFL.log2FoldChange |                | TUBE_HLTY.log2FoldChange |                | OXY1_INFL.log2FoldChange |                | OXY1_HLTY.log2FoldChange |         | OXY0_INFL.log2FoldChange |         | OXY0_HLTY.log2FoldChange |         |
|----------|--------------------------|----------------|--------------------------|----------------|--------------------------|----------------|--------------------------|---------|--------------------------|---------|--------------------------|---------|
|          | TUBE_INFL.padj           | TUBE_HLTY.padj | OXY1_INFL.padj           | OXY1_HLTY.padj | OXY0_INFL.padj           | OXY0_HLTY.padj |                          |         |                          |         |                          |         |
| CDC6     | 1.50                     | 6.3E-07        | 3.28                     | 1.9E-32        | 1.37                     | 5.8E-09        | 3.14                     | 4.0E-47 | 0.92                     | 2.5E-04 | 2.71                     | 1.8E-27 |
| IGLV3-25 | 3.22                     | 7.0E-08        | 4.66                     | 2.9E-19        | 4.19                     | 7.1E-20        | 5.60                     | 5.1E-43 | 3.28                     | 4.1E-10 | 4.71                     | 1.6E-23 |
| JCHAIN   | 2.72                     | 3.5E-09        | 3.97                     | 8.9E-23        | 2.87                     | 7.3E-16        | 4.10                     | 5.2E-39 | 2.43                     | 1.6E-09 | 3.67                     | 8.1E-24 |
| RRM2     | 1.55                     | 5.3E-06        | 3.23                     | 3.4E-26        | 1.57                     | 4.1E-09        | 3.22                     | 6.3E-42 | 1.08                     | 1.4E-04 | 2.77                     | 8.1E-24 |
| IGLV3-19 | 4.10                     | 1.1E-11        | 5.40                     | 4.4E-24        | 3.93                     | 6.1E-17        | 5.22                     | 2.6E-36 | 2.09                     | 3.0E-05 | 3.44                     | 1.0E-12 |
| IGLV3-1  | 2.65                     | 6.5E-07        | 3.68                     | 2.9E-15        | 3.91                     | 6.2E-21        | 4.91                     | 1.3E-40 | 2.35                     | 3.2E-07 | 3.38                     | 2.9E-15 |
| SDC1     | 2.83                     | 3.0E-06        | 4.85                     | 1.5E-18        | 3.51                     | 2.2E-13        | 5.48                     | 2.6E-35 | 2.78                     | 1.5E-07 | 4.78                     | 3.5E-21 |
| IGLV3-10 | 3.36                     | 1.5E-07        | 4.86                     | 3.3E-18        | 3.86                     | 6.9E-15        | 5.33                     | 3.6E-34 | 2.99                     | 4.9E-08 | 4.50                     | 9.6E-19 |
| IGHV1-24 | 3.53                     | 6.9E-07        | 4.52                     | 4.5E-13        | 5.03                     | 2.2E-19        | 5.97                     | 2.3E-33 | 3.52                     | 1.9E-08 | 4.49                     | 8.1E-15 |
| BHLHA15  | 2.38                     | 1.9E-06        | 4.05                     | 2.4E-18        | 2.81                     | 1.5E-12        | 4.44                     | 5.2E-32 | 2.04                     | 2.1E-06 | 3.71                     | 6.8E-18 |
| IGLC2    | 2.60                     | 2.1E-07        | 4.04                     | 3.1E-20        | 2.68                     | 4.1E-12        | 4.10                     | 2.9E-33 | 1.67                     | 5.2E-05 | 3.13                     | 3.6E-15 |
| BUB1     | 1.67                     | 2.2E-06        | 2.93                     | 1.2E-20        | 1.63                     | 3.2E-09        | 2.88                     | 1.7E-31 | 1.30                     | 1.3E-05 | 2.57                     | 3.0E-19 |
| TXNDC5   | 1.91                     | 5.0E-07        | 2.59                     | 6.4E-15        | 2.25                     | 4.0E-14        | 2.92                     | 5.9E-29 | 1.86                     | 2.1E-08 | 2.53                     | 1.0E-16 |
| CDC25A   | 1.46                     | 1.7E-04        | 3.56                     | 1.7E-22        | 1.48                     | 1.3E-06        | 3.55                     | 5.9E-34 | 0.79                     | 8.4E-03 | 2.92                     | 2.6E-18 |
| CAV1     | 2.34                     | 2.6E-07        | 3.33                     | 2.4E-16        | 2.53                     | 2.0E-12        | 3.50                     | 3.0E-26 | 2.21                     | 2.7E-08 | 3.19                     | 2.5E-17 |
| IGHV4-34 | 4.32                     | 1.6E-13        | 4.26                     | 8.6E-17        | 3.64                     | 1.6E-15        | 3.60                     | 3.7E-19 | 3.35                     | 1.4E-10 | 3.30                     | 2.3E-12 |
| HJURP    | 1.12                     | 1.1E-04        | 2.46                     | 1.1E-20        | 1.15                     | 3.9E-07        | 2.47                     | 1.5E-32 | 0.74                     | 2.0E-03 | 2.07                     | 8.1E-18 |
| IGKV3-20 | 2.77                     | 8.8E-10        | 3.42                     | 3.8E-18        | 2.64                     | 4.0E-14        | 3.28                     | 1.3E-26 | 1.60                     | 1.9E-05 | 2.27                     | 2.3E-10 |
| MZB1     | 2.29                     | 1.6E-06        | 3.63                     | 7.0E-18        | 2.49                     | 3.0E-11        | 3.81                     | 8.3E-31 | 1.37                     | 4.3E-04 | 2.75                     | 1.1E-12 |
| SHCBP1   | 1.27                     | 1.0E-05        | 2.38                     | 3.2E-20        | 1.13                     | 5.3E-07        | 2.22                     | 9.3E-28 | 0.92                     | 1.5E-04 | 2.03                     | 9.6E-18 |
| IGHV3-30 | 2.89                     | 2.8E-07        | 3.86                     | 3.3E-15        | 3.06                     | 2.1E-12        | 4.01                     | 2.0E-25 | 2.43                     | 4.6E-07 | 3.38                     | 4.1E-14 |
| MCM10    | 1.37                     | 5.9E-04        | 3.33                     | 7.8E-19        | 1.57                     | 7.6E-07        | 3.50                     | 6.5E-31 | 0.96                     | 2.9E-03 | 2.93                     | 2.8E-17 |
| GMNN     | 1.10                     | 1.9E-07        | 1.88                     | 1.9E-23        | 0.77                     | 2.5E-06        | 1.54                     | 2.1E-25 | 0.53                     | 2.6E-03 | 1.30                     | 3.9E-14 |
| IGLV2-14 | 2.30                     | 6.5E-07        | 3.26                     | 1.2E-15        | 2.70                     | 7.5E-14        | 3.63                     | 4.9E-30 | 1.24                     | 8.2E-04 | 2.23                     | 2.1E-09 |
| IGKV1-5  | 2.24                     | 5.8E-06        | 3.88                     | 1.2E-18        | 2.38                     | 9.5E-10        | 3.98                     | 6.4E-31 | 0.98                     | 7.9E-03 | 2.69                     | 2.1E-11 |
| CDC45    | 1.29                     | 1.6E-04        | 2.63                     | 3.4E-17        | 1.53                     | 2.1E-08        | 2.84                     | 2.8E-30 | 0.89                     | 1.6E-03 | 2.23                     | 8.0E-15 |
| IGKV1-12 | 2.06                     | 4.3E-06        | 3.33                     | 5.6E-17        | 2.21                     | 3.1E-10        | 3.44                     | 1.7E-28 | 1.30                     | 4.4E-04 | 2.57                     | 1.4E-12 |
| PYCR1    | 2.03                     | 6.9E-07        | 2.88                     | 1.7E-15        | 2.26                     | 2.0E-12        | 3.08                     | 5.1E-27 | 1.38                     | 5.7E-05 | 2.24                     | 1.9E-11 |
| IGLV1-47 | 2.33                     | 7.8E-07        | 3.74                     | 3.3E-19        | 2.07                     | 1.4E-08        | 3.47                     | 1.6E-26 | 1.26                     | 6.8E-04 | 2.74                     | 6.1E-13 |
| IGLV1-40 | 1.59                     | 7.8E-04        | 3.44                     | 3.9E-15        | 2.06                     | 9.3E-08        | 3.82                     | 1.5E-28 | 1.56                     | 1.5E-04 | 3.36                     | 6.4E-17 |
| IGKV3-15 | 2.19                     | 1.9E-06        | 2.75                     | 6.7E-12        | 2.73                     | 4.0E-14        | 3.26                     | 7.5E-25 | 2.02                     | 3.3E-07 | 2.58                     | 3.3E-12 |
| CCNA2    | 0.94                     | 2.2E-03        | 2.34                     | 2.8E-16        | 1.15                     | 2.7E-06        | 2.51                     | 1.7E-28 | 0.87                     | 8.2E-04 | 2.25                     | 1.1E-17 |
| IGLV2-8  | 2.82                     | 8.9E-08        | 4.29                     | 1.2E-20        | 1.97                     | 7.7E-07        | 3.45                     | 6.1E-22 | 1.63                     | 1.3E-04 | 3.15                     | 5.6E-14 |
| GGH      | 1.94                     | 9.9E-09        | 2.54                     | 5.9E-18        | 1.62                     | 5.7E-10        | 2.22                     | 1.2E-21 | 1.22                     | 1.9E-05 | 1.83                     | 1.4E-11 |
| NEK2     | 1.41                     | 1.1E-05        | 2.68                     | 1.7E-19        | 1.21                     | 1.6E-06        | 2.47                     | 1.3E-24 | 0.87                     | 1.0E-03 | 2.14                     | 6.2E-15 |
| NCAPG    | 1.70                     | 2.5E-05        | 3.21                     | 1.1E-18        | 1.50                     | 1.8E-06        | 3.00                     | 3.2E-25 | 1.08                     | 1.1E-03 | 2.60                     | 7.2E-15 |
| CDK1     | 1.51                     | 2.5E-04        | 3.52                     | 1.2E-19        | 1.22                     | 1.4E-04        | 3.20                     | 9.7E-25 | 0.91                     | 5.1E-03 | 2.93                     | 2.3E-16 |
| TTK      | 1.71                     | 1.5E-05        | 2.98                     | 2.2E-16        | 1.72                     | 3.9E-08        | 2.97                     | 1.0E-23 | 1.26                     | 1.3E-04 | 2.54                     | 5.2E-14 |
| IGLV2-23 | 1.93                     | 3.6E-05        | 3.25                     | 5.5E-15        | 2.32                     | 3.4E-10        | 3.60                     | 3.6E-28 | 1.05                     | 3.4E-03 | 2.42                     | 2.1E-10 |
| SKA3     | 1.97                     | 3.7E-06        | 3.26                     | 5.8E-17        | 1.79                     | 8.9E-08        | 3.08                     | 3.5E-22 | 1.42                     | 6.6E-05 | 2.73                     | 4.7E-14 |
| IGKV4-1  | 1.95                     | 5.9E-05        | 3.12                     | 4.2E-13        | 2.54                     | 5.6E-11        | 3.66                     | 5.6E-27 | 1.48                     | 2.5E-04 | 2.66                     | 2.2E-11 |
| TYMS     | 1.05                     | 1.9E-03        | 2.40                     | 1.3E-14        | 1.41                     | 2.7E-07        | 2.70                     | 3.8E-28 | 0.89                     | 1.8E-03 | 2.21                     | 1.1E-14 |
| IGLV3-16 | 2.83                     | 6.1E-07        | 3.25                     | 4.1E-11        | 3.28                     | 2.1E-13        | 3.68                     | 1.1E-20 | 2.60                     | 1.3E-07 | 3.02                     | 4.3E-11 |
| IGKC     | 1.86                     | 5.3E-05        | 3.18                     | 6.8E-15        | 2.15                     | 3.3E-09        | 3.43                     | 1.2E-26 | 1.18                     | 1.4E-03 | 2.52                     | 1.7E-11 |

Table\_S4.xlsx

| symbol    | TUBE_INFL.log2FoldChange |         | TUBE_HLTY.log2FoldChange |         | OXY1_INFL.log2FoldChange |         | OXY1_HLTY.log2FoldChange |         | OXY0_INFL.log2FoldChange |         | OXY0_HLTY.log2FoldChange |         |
|-----------|--------------------------|---------|--------------------------|---------|--------------------------|---------|--------------------------|---------|--------------------------|---------|--------------------------|---------|
|           | TUBE_INFL.padj           |         | TUBE_HLTY.padj           |         | OXY1_INFL.padj           |         | OXY1_HLTY.padj           |         | OXY0_INFL.padj           |         | OXY0_HLTY.padj           |         |
| GLDC      | 1.81                     | 3.3E-05 | 2.63                     | 1.1E-11 | 2.25                     | 8.6E-11 | 3.03                     | 8.5E-23 | 1.84                     | 1.2E-06 | 2.63                     | 1.8E-13 |
| TRIP13    | 1.30                     | 3.6E-05 | 2.32                     | 3.7E-16 | 1.31                     | 1.2E-07 | 2.31                     | 2.4E-24 | 0.87                     | 8.4E-04 | 1.89                     | 6.1E-13 |
| FABP5     | 1.14                     | 2.2E-06 | 2.01                     | 8.7E-21 | 0.71                     | 1.3E-04 | 1.58                     | 8.9E-21 | 0.59                     | 2.9E-03 | 1.46                     | 1.0E-13 |
| IGKV1-17  | 1.96                     | 2.2E-04 | 2.98                     | 1.8E-10 | 3.16                     | 7.7E-14 | 4.14                     | 1.9E-28 | 1.41                     | 9.2E-04 | 2.47                     | 1.3E-08 |
| IGLV4-69  | 2.38                     | 4.1E-07 | 3.17                     | 1.1E-14 | 2.43                     | 3.3E-11 | 3.20                     | 3.4E-23 | 1.37                     | 3.2E-04 | 2.19                     | 6.0E-09 |
| IGLV9-49  | 2.32                     | 9.7E-06 | 2.84                     | 4.7E-10 | 3.14                     | 4.0E-14 | 3.63                     | 2.5E-23 | 2.09                     | 3.1E-06 | 2.62                     | 7.7E-10 |
| IGKV1D-33 | 1.37                     | 4.7E-03 | 3.06                     | 3.9E-11 | 2.44                     | 4.1E-09 | 3.99                     | 1.8E-27 | 1.63                     | 1.9E-04 | 3.23                     | 4.7E-14 |
| CDCA3     | 1.38                     | 2.2E-05 | 2.22                     | 1.9E-14 | 1.53                     | 2.5E-09 | 2.34                     | 2.0E-24 | 0.87                     | 9.5E-04 | 1.72                     | 1.1E-10 |
| IGKV2D-29 | 2.58                     | 2.5E-06 | 2.69                     | 1.2E-08 | 3.64                     | 3.5E-17 | 3.74                     | 7.8E-23 | 2.07                     | 8.0E-06 | 2.19                     | 5.8E-07 |
| ZWINT     | 1.30                     | 1.9E-05 | 1.96                     | 2.8E-13 | 1.49                     | 4.9E-10 | 2.13                     | 1.3E-23 | 0.91                     | 3.4E-04 | 1.57                     | 2.5E-10 |
| MELK      | 1.48                     | 1.2E-04 | 2.93                     | 1.2E-16 | 1.27                     | 2.3E-05 | 2.71                     | 1.9E-21 | 1.06                     | 8.4E-04 | 2.52                     | 1.4E-14 |
| DTL       | 1.14                     | 1.8E-03 | 2.53                     | 1.2E-13 | 1.47                     | 6.8E-07 | 2.81                     | 6.6E-25 | 0.98                     | 1.3E-03 | 2.36                     | 7.2E-14 |
| IGHV4-39  | 2.34                     | 5.3E-06 | 2.74                     | 8.5E-10 | 2.95                     | 2.6E-13 | 3.33                     | 1.1E-20 | 2.10                     | 1.7E-06 | 2.50                     | 1.6E-09 |
| MYBL2     | 2.01                     | 2.1E-06 | 2.95                     | 2.4E-15 | 1.89                     | 9.4E-09 | 2.81                     | 5.8E-22 | 1.10                     | 1.2E-03 | 2.06                     | 1.5E-09 |
| IGLV3-9   | 2.05                     | 8.9E-04 | 3.53                     | 2.4E-10 | 2.14                     | 1.2E-05 | 3.57                     | 1.1E-15 | 3.39                     | 2.2E-09 | 4.78                     | 2.5E-20 |
| DLGAP5    | 1.42                     | 5.3E-04 | 2.97                     | 2.9E-15 | 1.42                     | 1.1E-05 | 2.94                     | 1.4E-22 | 1.06                     | 1.5E-03 | 2.62                     | 4.7E-14 |
| UCHL1     | 2.96                     | 1.2E-06 | 4.98                     | 3.0E-18 | 2.19                     | 4.2E-06 | 4.19                     | 2.4E-19 | 1.40                     | 3.0E-03 | 3.49                     | 5.1E-11 |
| CCNB1     | 1.52                     | 1.9E-06 | 2.01                     | 6.2E-13 | 1.57                     | 3.1E-10 | 2.05                     | 1.8E-20 | 1.07                     | 6.6E-05 | 1.56                     | 1.4E-09 |
| CDCA2     | 1.51                     | 1.5E-04 | 2.80                     | 2.3E-14 | 1.58                     | 6.7E-07 | 2.82                     | 1.1E-21 | 1.14                     | 5.9E-04 | 2.42                     | 1.0E-12 |
| TNFRSF17  | 2.49                     | 4.0E-07 | 2.95                     | 4.8E-12 | 2.54                     | 4.2E-11 | 2.98                     | 1.4E-18 | 1.89                     | 6.3E-06 | 2.34                     | 2.8E-09 |
| PBK       | 1.89                     | 1.2E-04 | 4.14                     | 5.6E-17 | 1.53                     | 7.1E-05 | 3.77                     | 2.0E-19 | 1.28                     | 1.2E-03 | 3.57                     | 2.4E-14 |
| CENPA     | 1.56                     | 5.0E-05 | 2.83                     | 3.4E-15 | 1.55                     | 4.5E-07 | 2.79                     | 2.8E-21 | 0.99                     | 1.6E-03 | 2.27                     | 1.4E-11 |
| EXO1      | 1.66                     | 1.6E-05 | 2.30                     | 1.2E-11 | 1.85                     | 1.3E-09 | 2.48                     | 1.7E-19 | 1.46                     | 8.2E-06 | 2.11                     | 2.4E-11 |
| IGKV3-11  | 1.86                     | 9.4E-06 | 2.30                     | 3.3E-10 | 2.34                     | 9.7E-13 | 2.75                     | 2.1E-21 | 1.41                     | 5.9E-05 | 1.84                     | 4.8E-08 |
| E2F8      | 1.06                     | 6.9E-03 | 2.85                     | 3.8E-13 | 1.49                     | 6.7E-06 | 3.19                     | 1.3E-23 | 0.97                     | 3.2E-03 | 2.74                     | 6.9E-14 |
| IGKV1-27  | 2.93                     | 2.6E-07 | 3.69                     | 9.1E-14 | 2.89                     | 7.3E-11 | 3.62                     | 2.0E-20 | 1.37                     | 1.8E-03 | 2.17                     | 1.3E-06 |
| IGKV2D-40 | 2.13                     | 7.3E-05 | 2.65                     | 1.8E-08 | 3.17                     | 2.1E-13 | 3.64                     | 1.5E-21 | 2.00                     | 1.6E-05 | 2.50                     | 1.6E-08 |
| IGKV3D-11 | 1.73                     | 7.1E-05 | 2.36                     | 7.5E-10 | 2.33                     | 1.7E-11 | 2.92                     | 1.0E-21 | 1.50                     | 4.7E-05 | 2.12                     | 2.5E-09 |
| CCNB2     | 1.69                     | 7.6E-06 | 2.65                     | 1.6E-15 | 1.45                     | 8.0E-07 | 2.40                     | 7.7E-20 | 0.93                     | 1.9E-03 | 1.93                     | 3.2E-10 |
| IGHA1     | 1.58                     | 2.3E-03 | 3.23                     | 1.8E-11 | 2.35                     | 4.3E-08 | 3.90                     | 1.4E-24 | 1.15                     | 4.9E-03 | 2.82                     | 2.3E-10 |
| IGKV1-9   | 1.72                     | 5.5E-04 | 2.71                     | 1.3E-09 | 2.55                     | 2.5E-10 | 3.47                     | 2.3E-22 | 1.59                     | 1.6E-04 | 2.56                     | 7.1E-10 |
| LINC01484 | 1.87                     | 1.8E-05 | 3.24                     | 2.6E-15 | 1.66                     | 1.8E-06 | 3.00                     | 9.3E-19 | 1.14                     | 1.3E-03 | 2.53                     | 5.1E-11 |
| IGLV4-60  | 2.96                     | 2.5E-05 | 3.97                     | 1.4E-10 | 2.53                     | 2.7E-06 | 3.55                     | 5.8E-13 | 3.68                     | 4.3E-09 | 4.64                     | 6.5E-16 |
| SEC11C    | 1.60                     | 2.9E-09 | 1.62                     | 3.2E-12 | 1.30                     | 3.3E-10 | 1.32                     | 6.1E-13 | 1.15                     | 4.9E-07 | 1.17                     | 4.4E-08 |
| IGKV2D-28 | 2.36                     | 2.3E-06 | 3.49                     | 1.2E-15 | 1.94                     | 4.1E-07 | 3.08                     | 2.2E-19 | 1.00                     | 6.8E-03 | 2.22                     | 2.5E-08 |
| IGHV3-13  | 1.98                     | 1.4E-03 | 2.12                     | 2.6E-05 | 3.75                     | 5.3E-16 | 3.84                     | 2.6E-22 | 4.81                     | 6.1E-05 | 4.89                     | 3.0E-06 |
| IGLV7-43  | 2.31                     | 4.0E-05 | 2.83                     | 7.8E-09 | 3.38                     | 4.4E-14 | 3.85                     | 1.4E-22 | 1.09                     | 6.6E-03 | 1.70                     | 1.1E-04 |
| SKA1      | 1.16                     | 1.0E-07 | 1.61                     | 5.1E-17 | 0.78                     | 3.5E-06 | 1.22                     | 8.5E-16 | 0.52                     | 4.3E-03 | 0.95                     | 7.5E-08 |
| IGKV1-33  | 1.69                     | 2.0E-03 | 2.62                     | 1.4E-07 | 2.85                     | 3.7E-10 | 3.68                     | 9.2E-20 | 2.18                     | 9.6E-06 | 3.03                     | 1.0E-10 |
| KIF11     | 1.47                     | 2.1E-05 | 1.93                     | 2.3E-10 | 1.56                     | 1.1E-08 | 1.99                     | 2.1E-16 | 1.36                     | 5.5E-06 | 1.80                     | 2.0E-10 |
| IGHV3-20  | 2.65                     | 6.2E-05 | 3.23                     | 2.3E-08 | 3.89                     | 2.1E-13 | 4.43                     | 3.6E-21 | 1.63                     | 1.7E-03 | 2.25                     | 2.2E-05 |
| IGHV4-28  | 1.50                     | 2.6E-03 | 2.71                     | 4.7E-09 | 2.42                     | 5.5E-09 | 3.53                     | 2.9E-21 | 1.50                     | 4.3E-04 | 2.68                     | 5.4E-10 |
| GINS2     | 1.52                     | 1.3E-05 | 2.27                     | 1.6E-13 | 1.44                     | 1.2E-07 | 2.18                     | 4.1E-19 | 0.75                     | 5.8E-03 | 1.52                     | 7.8E-08 |
| AURKA     | 0.87                     | 3.1E-04 | 1.41                     | 4.7E-11 | 1.01                     | 1.1E-07 | 1.53                     | 2.7E-19 | 0.67                     | 8.6E-04 | 1.20                     | 1.4E-09 |

Table\_S4.xlsx

| symbol            | TUBE_INFL.log2FoldChange |         | TUBE_HLTY.log2FoldChange |         | OXY1_INFL.log2FoldChange |         | OXY1_HLTY.log2FoldChange |         | OXY0_INFL.log2FoldChange |         | OXY0_HLTY.log2FoldChange |         |
|-------------------|--------------------------|---------|--------------------------|---------|--------------------------|---------|--------------------------|---------|--------------------------|---------|--------------------------|---------|
|                   | TUBE_INFL.padj           |         | TUBE_HLTY.padj           |         | OXY1_INFL.padj           |         | OXY1_HLTY.padj           |         | OXY0_INFL.padj           |         | OXY0_HLTY.padj           |         |
| NUSAP1            | 1.13                     | 4.6E-05 | 1.70                     | 6.3E-12 | 1.18                     | 7.3E-08 | 1.72                     | 1.3E-18 | 0.74                     | 1.4E-03 | 1.29                     | 1.6E-08 |
| IGKV3D-20         | 1.77                     | 2.8E-03 | 2.68                     | 7.0E-07 | 2.28                     | 3.1E-06 | 3.10                     | 1.7E-12 | 3.31                     | 3.2E-09 | 4.11                     | 9.6E-16 |
| BUB1B             | 1.52                     | 2.3E-04 | 2.42                     | 7.3E-11 | 1.72                     | 1.6E-07 | 2.58                     | 4.9E-18 | 1.14                     | 8.0E-04 | 2.03                     | 3.6E-09 |
| IGHV3-43          | 2.11                     | 4.8E-04 | 3.31                     | 1.1E-09 | 2.86                     | 4.2E-09 | 3.98                     | 4.0E-20 | 1.37                     | 3.4E-03 | 2.60                     | 2.0E-07 |
| IGHV3-33          | 1.54                     | 3.0E-03 | 2.41                     | 3.8E-07 | 2.80                     | 1.3E-10 | 3.58                     | 1.6E-20 | 1.59                     | 4.3E-04 | 2.41                     | 6.9E-08 |
| IGHV1-46          | 1.63                     | 3.4E-03 | 2.95                     | 1.2E-08 | 2.33                     | 4.9E-07 | 3.54                     | 1.5E-17 | 2.05                     | 4.4E-05 | 3.29                     | 1.2E-11 |
| IGHV3-21          | 1.72                     | 7.3E-04 | 2.35                     | 1.8E-07 | 2.68                     | 6.5E-11 | 3.26                     | 2.8E-19 | 1.51                     | 3.2E-04 | 2.14                     | 3.2E-07 |
| UAP1              | 1.40                     | 6.5E-08 | 0.98                     | 6.6E-06 | 1.45                     | 2.2E-13 | 1.02                     | 3.1E-09 | 1.39                     | 5.5E-10 | 0.96                     | 1.7E-06 |
| POLQ              | 0.97                     | 3.5E-03 | 2.06                     | 5.4E-11 | 1.19                     | 9.2E-06 | 2.24                     | 9.3E-19 | 0.81                     | 3.5E-03 | 1.87                     | 1.3E-10 |
| PLAAT2            | 1.63                     | 4.9E-04 | 3.16                     | 2.7E-13 | 1.33                     | 2.2E-04 | 2.85                     | 3.7E-16 | 1.10                     | 3.0E-03 | 2.66                     | 4.0E-11 |
| IGHV3-73          | 2.63                     | 7.6E-05 | 3.60                     | 9.5E-10 | 2.53                     | 1.3E-06 | 3.46                     | 2.1E-13 | 2.70                     | 2.8E-06 | 3.64                     | 3.1E-11 |
| IGHV1-18          | 1.45                     | 3.7E-03 | 2.32                     | 4.3E-07 | 2.61                     | 4.9E-10 | 3.38                     | 9.1E-20 | 1.51                     | 5.0E-04 | 2.32                     | 6.9E-08 |
| HASPIN            | 1.33                     | 2.5E-04 | 2.11                     | 1.2E-10 | 1.50                     | 2.2E-07 | 2.25                     | 1.8E-17 | 0.94                     | 1.5E-03 | 1.72                     | 1.7E-08 |
| IGHV3-15          | 1.79                     | 3.1E-04 | 2.16                     | 6.0E-07 | 2.42                     | 1.3E-09 | 2.75                     | 6.5E-15 | 2.13                     | 1.1E-06 | 2.47                     | 1.8E-09 |
| IGLV5-45          | 3.12                     | 4.4E-07 | 3.37                     | 2.7E-10 | 3.10                     | 1.3E-10 | 3.34                     | 4.4E-15 | 1.55                     | 1.1E-03 | 1.84                     | 9.3E-05 |
| CHAC2             | 1.61                     | 2.0E-06 | 1.77                     | 1.7E-09 | 1.56                     | 6.1E-09 | 1.70                     | 6.2E-13 | 1.30                     | 7.6E-06 | 1.44                     | 1.2E-07 |
| DEPDC1            | 1.81                     | 5.5E-04 | 4.24                     | 1.5E-14 | 1.17                     | 2.8E-03 | 3.61                     | 3.5E-14 | 1.18                     | 4.1E-03 | 3.66                     | 4.9E-12 |
| IGHV1-69D         | 2.74                     | 8.8E-05 | 2.27                     | 9.8E-05 | 4.15                     | 1.3E-13 | 3.66                     | 1.1E-13 | 3.19                     | 2.6E-07 | 2.68                     | 2.2E-06 |
| LMAN1             | 1.13                     | 1.4E-05 | 1.09                     | 1.7E-06 | 1.24                     | 1.4E-09 | 1.17                     | 1.1E-10 | 1.32                     | 9.7E-09 | 1.23                     | 3.9E-09 |
| PTTG1             | 1.38                     | 4.2E-07 | 1.72                     | 5.4E-13 | 1.04                     | 6.8E-07 | 1.37                     | 2.3E-13 | 0.67                     | 2.3E-03 | 1.01                     | 3.7E-06 |
| KCNN3             | 1.65                     | 2.7E-05 | 2.01                     | 6.1E-09 | 1.87                     | 2.3E-09 | 2.19                     | 2.5E-15 | 1.18                     | 3.2E-04 | 1.52                     | 1.8E-06 |
| GINS1             | 1.17                     | 3.5E-04 | 1.84                     | 2.8E-10 | 1.23                     | 1.7E-06 | 1.88                     | 9.2E-16 | 0.86                     | 1.5E-03 | 1.52                     | 2.0E-08 |
| CHEK1             | 1.05                     | 3.5E-04 | 1.67                     | 1.8E-10 | 1.11                     | 1.9E-06 | 1.70                     | 3.9E-16 | 0.71                     | 3.1E-03 | 1.32                     | 5.1E-08 |
| DEPDC1B           | 1.36                     | 7.0E-04 | 2.35                     | 1.7E-10 | 1.29                     | 4.5E-05 | 2.25                     | 5.4E-14 | 1.24                     | 2.8E-04 | 2.20                     | 1.4E-10 |
| IGKV6D-21         | 2.94                     | 1.7E-05 | 4.03                     | 2.6E-11 | 2.52                     | 2.0E-06 | 3.59                     | 1.2E-13 | 1.72                     | 9.6E-04 | 2.90                     | 1.5E-07 |
| ITM2C             | 1.67                     | 4.9E-07 | 1.14                     | 4.8E-05 | 1.97                     | 4.0E-14 | 1.43                     | 3.8E-10 | 1.47                     | 3.3E-07 | 0.91                     | 4.3E-04 |
| HSP90B1           | 0.87                     | 1.4E-04 | 1.17                     | 6.2E-09 | 0.90                     | 5.1E-07 | 1.18                     | 1.6E-13 | 0.78                     | 7.2E-05 | 1.05                     | 1.6E-08 |
| OIP5              | 1.47                     | 1.1E-04 | 2.33                     | 2.0E-11 | 1.31                     | 1.4E-05 | 2.15                     | 4.7E-14 | 0.93                     | 2.6E-03 | 1.79                     | 3.9E-08 |
| IGHV3-23          | 1.50                     | 8.2E-04 | 2.16                     | 6.9E-08 | 2.03                     | 2.3E-08 | 2.63                     | 3.2E-16 | 1.22                     | 8.6E-04 | 1.88                     | 4.6E-07 |
| HMGB3             | 1.76                     | 3.2E-08 | 1.68                     | 5.3E-10 | 1.47                     | 2.3E-09 | 1.38                     | 1.2E-10 | 0.98                     | 1.8E-04 | 0.90                     | 2.4E-04 |
| IGHV3-7           | 2.01                     | 1.4E-04 | 2.43                     | 1.4E-07 | 2.64                     | 3.8E-10 | 3.01                     | 6.8E-16 | 1.28                     | 2.1E-03 | 1.71                     | 5.3E-05 |
| KIF15             | 1.02                     | 6.6E-03 | 2.15                     | 2.7E-09 | 1.31                     | 2.8E-05 | 2.36                     | 6.1E-16 | 0.98                     | 2.2E-03 | 2.07                     | 8.5E-10 |
| IGKV5-2           | 2.34                     | 2.7E-05 | 1.98                     | 2.2E-05 | 2.84                     | 1.6E-10 | 2.47                     | 1.5E-10 | 2.59                     | 1.4E-07 | 2.21                     | 7.9E-07 |
| ENSG00000216775.3 | 2.71                     | 4.4E-07 | 2.76                     | 1.6E-09 | 2.25                     | 1.2E-07 | 2.30                     | 5.9E-10 | 1.90                     | 2.6E-05 | 1.95                     | 3.8E-06 |
| IGHV1-2           | 1.52                     | 3.5E-03 | 2.22                     | 3.4E-06 | 2.67                     | 1.2E-09 | 3.27                     | 5.5E-17 | 1.35                     | 1.8E-03 | 2.02                     | 6.1E-06 |
| XBP1              | 0.75                     | 3.4E-05 | 0.75                     | 2.5E-06 | 0.87                     | 7.1E-10 | 0.84                     | 1.3E-11 | 0.70                     | 6.9E-06 | 0.68                     | 3.7E-06 |
| IGHV3-53          | 1.62                     | 1.1E-03 | 1.83                     | 2.3E-05 | 2.47                     | 9.5E-10 | 2.64                     | 1.7E-13 | 1.91                     | 1.2E-05 | 2.09                     | 4.6E-07 |
| CKAP2L            | 0.99                     | 8.3E-03 | 2.23                     | 1.8E-09 | 1.17                     | 1.8E-04 | 2.33                     | 1.1E-14 | 0.94                     | 3.5E-03 | 2.13                     | 7.7E-10 |
| SPC25             | 1.90                     | 3.3E-06 | 2.50                     | 3.5E-12 | 1.33                     | 2.5E-05 | 1.93                     | 2.3E-11 | 0.91                     | 4.5E-03 | 1.53                     | 3.7E-06 |
| UBE2T             | 1.50                     | 1.1E-06 | 1.51                     | 1.3E-08 | 1.33                     | 4.7E-08 | 1.32                     | 4.6E-10 | 1.08                     | 3.9E-05 | 1.07                     | 1.2E-05 |
| GPRC5D            | 1.93                     | 8.0E-04 | 2.49                     | 9.4E-07 | 2.52                     | 7.1E-08 | 3.03                     | 4.3E-13 | 2.01                     | 5.9E-05 | 2.53                     | 1.4E-07 |
| ASPM              | 1.32                     | 4.5E-03 | 2.72                     | 1.1E-09 | 1.34                     | 3.5E-04 | 2.67                     | 1.4E-13 | 1.22                     | 1.9E-03 | 2.59                     | 5.7E-10 |
| IGHV3-69-1        | 2.76                     | 1.9E-05 | 1.96                     | 1.9E-04 | 3.80                     | 1.5E-13 | 3.00                     | 1.4E-11 | 2.32                     | 2.3E-05 | 1.46                     | 1.8E-03 |
| MIXL1             | 1.74                     | 1.3E-04 | 2.35                     | 6.4E-09 | 1.78                     | 1.0E-06 | 2.35                     | 1.1E-12 | 1.29                     | 6.3E-04 | 1.89                     | 5.8E-07 |

Table\_S4.xlsx

| symbol            | TUBE_INFL.log2FoldChange |         | TUBE_INFL.padj |         | TUBE_HLTY.log2FoldChange |         | TUBE_HLTY.padj |         | OXY1_INFL.log2FoldChange |         | OXY1_INFL.padj |         | OXY1_HLTY.log2FoldChange |  | OXY1_HLTY.padj |  | OXY0_INFL.log2FoldChange |  | OXY0_INFL.padj |  | OXY0_HLTY.log2FoldChange |  | OXY0_HLTY.padj |  |
|-------------------|--------------------------|---------|----------------|---------|--------------------------|---------|----------------|---------|--------------------------|---------|----------------|---------|--------------------------|--|----------------|--|--------------------------|--|----------------|--|--------------------------|--|----------------|--|
| ORC1              | 0.77                     | 6.1E-03 | 1.34           | 3.2E-07 | 1.20                     | 2.8E-07 | 1.71           | 4.2E-16 | 0.67                     | 4.9E-03 | 1.20           | 8.7E-07 |                          |  |                |  |                          |  |                |  |                          |  |                |  |
| MANF              | 0.93                     | 1.1E-05 | 1.13           | 1.3E-09 | 0.82                     | 7.3E-07 | 1.00           | 1.1E-11 | 0.57                     | 1.4E-03 | 0.75           | 1.3E-05 |                          |  |                |  |                          |  |                |  |                          |  |                |  |
| IGLVI-70          | 2.92                     | 5.0E-05 | 3.55           | 2.1E-08 | 3.07                     | 5.4E-08 | 3.70           | 5.4E-13 | 1.67                     | 2.2E-03 | 2.38           | 3.7E-05 |                          |  |                |  |                          |  |                |  |                          |  |                |  |
| PRDX4             | 0.74                     | 2.0E-03 | 1.41           | 1.8E-10 | 0.64                     | 7.3E-04 | 1.26           | 3.4E-13 | 0.56                     | 5.7E-03 | 1.19           | 5.6E-09 |                          |  |                |  |                          |  |                |  |                          |  |                |  |
| ENSG00000259772.6 | 1.49                     | 1.1E-04 | 2.06           | 1.1E-09 | 1.36                     | 5.9E-06 | 1.92           | 1.5E-12 | 0.94                     | 2.3E-03 | 1.52           | 1.2E-06 |                          |  |                |  |                          |  |                |  |                          |  |                |  |
| IGHV2-26          | 1.99                     | 3.7E-04 | 2.88           | 6.8E-09 | 2.02                     | 4.7E-06 | 2.87           | 6.4E-13 | 1.44                     | 1.3E-03 | 2.35           | 3.6E-07 |                          |  |                |  |                          |  |                |  |                          |  |                |  |
| NT5DC2            | 1.39                     | 8.0E-05 | 1.61           | 1.7E-07 | 1.65                     | 3.9E-09 | 1.83           | 1.2E-13 | 0.81                     | 4.3E-03 | 1.01           | 3.0E-04 |                          |  |                |  |                          |  |                |  |                          |  |                |  |
| ERLEC1            | 0.70                     | 9.7E-05 | 0.82           | 2.3E-07 | 0.65                     | 3.3E-06 | 0.75           | 1.8E-09 | 0.72                     | 4.1E-06 | 0.81           | 2.7E-08 |                          |  |                |  |                          |  |                |  |                          |  |                |  |
| CHPF              | 1.28                     | 8.8E-05 | 1.30           | 4.9E-06 | 1.64                     | 2.9E-10 | 1.62           | 1.4E-12 | 0.95                     | 5.3E-04 | 0.94           | 3.2E-04 |                          |  |                |  |                          |  |                |  |                          |  |                |  |
| IGHV1-58          | 2.34                     | 1.7E-04 | 1.88           | 2.3E-04 | 3.08                     | 8.8E-10 | 2.61           | 1.5E-09 | 2.81                     | 3.3E-07 | 2.34           | 2.7E-06 |                          |  |                |  |                          |  |                |  |                          |  |                |  |
| CIP2A             | 1.08                     | 7.7E-04 | 1.54           | 9.3E-08 | 1.06                     | 3.2E-05 | 1.48           | 1.5E-10 | 1.13                     | 4.6E-05 | 1.56           | 6.3E-09 |                          |  |                |  |                          |  |                |  |                          |  |                |  |
| SPAG5             | 1.09                     | 4.7E-05 | 1.20           | 2.6E-07 | 1.14                     | 4.7E-08 | 1.24           | 2.6E-11 | 0.73                     | 1.0E-03 | 0.82           | 1.2E-04 |                          |  |                |  |                          |  |                |  |                          |  |                |  |
| DERL3             | 1.66                     | 1.6E-05 | 1.36           | 3.2E-05 | 2.01                     | 3.3E-11 | 1.68           | 2.0E-10 | 1.17                     | 2.3E-04 | 0.84           | 3.5E-03 |                          |  |                |  |                          |  |                |  |                          |  |                |  |
| NME1              | 1.34                     | 2.0E-06 | 1.47           | 2.1E-09 | 1.10                     | 5.3E-07 | 1.22           | 4.0E-10 | 0.61                     | 7.2E-03 | 0.73           | 9.7E-04 |                          |  |                |  |                          |  |                |  |                          |  |                |  |
| HPDL              | 1.51                     | 7.9E-04 | 2.05           | 3.2E-07 | 1.77                     | 1.1E-06 | 2.27           | 4.7E-12 | 1.16                     | 1.6E-03 | 1.69           | 6.3E-06 |                          |  |                |  |                          |  |                |  |                          |  |                |  |
| IGKV3-7           | 1.50                     | 4.1E-03 | 2.50           | 3.6E-07 | 2.09                     | 2.1E-06 | 3.00           | 1.6E-13 | 1.11                     | 7.2E-03 | 2.10           | 4.6E-06 |                          |  |                |  |                          |  |                |  |                          |  |                |  |
| SPCS2             | 0.55                     | 2.1E-07 | 0.45           | 8.3E-07 | 0.43                     | 1.6E-07 | 0.33           | 7.6E-06 | 0.44                     | 1.8E-06 | 0.33           | 1.1E-04 |                          |  |                |  |                          |  |                |  |                          |  |                |  |
| B4GALT2           | 1.28                     | 3.7E-06 | 1.01           | 2.0E-05 | 1.38                     | 1.7E-10 | 1.10           | 6.2E-09 | 0.89                     | 1.3E-04 | 0.60           | 4.8E-03 |                          |  |                |  |                          |  |                |  |                          |  |                |  |
| IGLV4-3           | 2.55                     | 1.9E-05 | 2.04           | 2.5E-05 | 3.00                     | 6.1E-10 | 2.49           | 7.3E-10 | 1.89                     | 1.6E-04 | 1.35           | 1.7E-03 |                          |  |                |  |                          |  |                |  |                          |  |                |  |
| SSR3              | 0.74                     | 7.8E-07 | 0.54           | 3.3E-05 | 0.64                     | 3.3E-08 | 0.44           | 2.5E-05 | 0.70                     | 7.6E-08 | 0.49           | 4.9E-05 |                          |  |                |  |                          |  |                |  |                          |  |                |  |
| PSAT1             | 1.26                     | 2.4E-06 | 1.25           | 6.7E-08 | 0.99                     | 1.7E-06 | 0.97           | 1.1E-07 | 0.89                     | 7.1E-05 | 0.87           | 4.1E-05 |                          |  |                |  |                          |  |                |  |                          |  |                |  |
| SLC16A14          | 2.41                     | 1.0E-06 | 1.28           | 8.6E-04 | 2.56                     | 1.4E-10 | 1.42           | 7.4E-06 | 2.30                     | 1.2E-07 | 1.12           | 1.3E-03 |                          |  |                |  |                          |  |                |  |                          |  |                |  |
| DHFR              | 0.62                     | 2.1E-03 | 1.06           | 4.2E-09 | 0.52                     | 1.2E-03 | 0.93           | 8.9E-11 | 0.50                     | 4.6E-03 | 0.89           | 8.2E-08 |                          |  |                |  |                          |  |                |  |                          |  |                |  |
| FAM83D            | 1.06                     | 4.2E-04 | 1.19           | 6.1E-06 | 1.31                     | 5.9E-08 | 1.40           | 3.7E-11 | 0.84                     | 8.2E-04 | 0.94           | 9.5E-05 |                          |  |                |  |                          |  |                |  |                          |  |                |  |
| IGKV1D-8          | 1.61                     | 1.1E-03 | 1.88           | 1.4E-05 | 2.11                     | 1.7E-07 | 2.32           | 7.6E-11 | 1.53                     | 2.8E-04 | 1.76           | 1.5E-05 |                          |  |                |  |                          |  |                |  |                          |  |                |  |
| CALU              | 0.49                     | 3.3E-04 | 0.55           | 7.4E-06 | 0.53                     | 1.0E-06 | 0.56           | 4.9E-09 | 0.50                     | 4.0E-05 | 0.52           | 3.9E-06 |                          |  |                |  |                          |  |                |  |                          |  |                |  |
| FKBP11            | 0.84                     | 1.4E-04 | 0.78           | 5.6E-05 | 1.04                     | 1.4E-09 | 0.96           | 4.3E-10 | 0.64                     | 5.5E-04 | 0.55           | 1.7E-03 |                          |  |                |  |                          |  |                |  |                          |  |                |  |
| ETFA              | 0.61                     | 1.5E-07 | 0.56           | 3.3E-08 | 0.42                     | 3.6E-06 | 0.37           | 8.6E-06 | 0.40                     | 9.0E-05 | 0.33           | 5.2E-04 |                          |  |                |  |                          |  |                |  |                          |  |                |  |
| IGLL5             | 2.16                     | 1.1E-04 | 1.73           | 2.0E-04 | 2.57                     | 6.9E-09 | 2.10           | 4.2E-08 | 2.16                     | 8.6E-06 | 1.65           | 1.3E-04 |                          |  |                |  |                          |  |                |  |                          |  |                |  |
| PARM1             | 1.51                     | 5.8E-05 | 1.17           | 2.2E-04 | 1.68                     | 1.6E-08 | 1.31           | 3.3E-07 | 1.55                     | 2.0E-06 | 1.17           | 7.7E-05 |                          |  |                |  |                          |  |                |  |                          |  |                |  |
| CENPF             | 1.26                     | 8.5E-05 | 1.49           | 1.1E-07 | 1.18                     | 2.6E-06 | 1.39           | 5.8E-10 | 0.72                     | 5.0E-03 | 0.94           | 2.5E-04 |                          |  |                |  |                          |  |                |  |                          |  |                |  |
| ENSG00000270933.1 | 1.70                     | 4.2E-05 | 1.37           | 6.4E-05 | 1.97                     | 5.1E-09 | 1.61           | 1.0E-08 | 1.33                     | 1.4E-04 | 0.97           | 1.6E-03 |                          |  |                |  |                          |  |                |  |                          |  |                |  |
| ERCC6L            | 1.52                     | 1.2E-03 | 2.06           | 9.5E-07 | 1.71                     | 7.7E-06 | 2.20           | 3.0E-10 | 1.23                     | 1.5E-03 | 1.75           | 9.9E-06 |                          |  |                |  |                          |  |                |  |                          |  |                |  |
| CCNE1             | 1.30                     | 1.8E-05 | 1.10           | 2.3E-05 | 1.36                     | 1.3E-08 | 1.13           | 4.3E-08 | 0.96                     | 1.7E-04 | 0.73           | 1.8E-03 |                          |  |                |  |                          |  |                |  |                          |  |                |  |
| IRF4              | 1.19                     | 1.8E-05 | 0.77           | 1.2E-03 | 1.27                     | 5.3E-09 | 0.82           | 1.7E-05 | 1.25                     | 2.6E-07 | 0.78           | 3.6E-04 |                          |  |                |  |                          |  |                |  |                          |  |                |  |
| POLE2             | 1.45                     | 1.5E-04 | 1.65           | 7.4E-07 | 1.34                     | 1.0E-05 | 1.52           | 2.0E-08 | 1.13                     | 4.2E-04 | 1.31           | 2.2E-05 |                          |  |                |  |                          |  |                |  |                          |  |                |  |
| FER1L4            | 1.93                     | 2.4E-05 | 1.69           | 1.3E-05 | 2.00                     | 3.3E-08 | 1.73           | 3.0E-08 | 1.30                     | 5.3E-04 | 1.01           | 2.5E-03 |                          |  |                |  |                          |  |                |  |                          |  |                |  |
| MCUR1             | 0.75                     | 5.1E-08 | 0.44           | 1.9E-04 | 0.58                     | 6.9E-08 | 0.26           | 6.4E-03 | 0.65                     | 5.3E-08 | 0.33           | 2.9E-03 |                          |  |                |  |                          |  |                |  |                          |  |                |  |
| STIL              | 0.86                     | 2.9E-03 | 1.19           | 6.7E-06 | 1.00                     | 2.5E-05 | 1.27           | 2.2E-09 | 0.87                     | 6.0E-04 | 1.14           | 3.3E-06 |                          |  |                |  |                          |  |                |  |                          |  |                |  |
| EIF2S1            | 0.39                     | 7.2E-04 | 0.38           | 1.4E-04 | 0.37                     | 2.2E-05 | 0.36           | 6.0E-06 | 0.49                     | 6.2E-07 | 0.47           | 3.2E-07 |                          |  |                |  |                          |  |                |  |                          |  |                |  |
| FAM111B           | 1.74                     | 2.8E-05 | 1.30           | 1.8E-04 | 1.76                     | 9.0E-08 | 1.29           | 4.0E-06 | 1.64                     | 5.3E-06 | 1.15           | 3.2E-04 |                          |  |                |  |                          |  |                |  |                          |  |                |  |
| POU2AF1           | 1.54                     | 5.7E-06 | 1.12           | 1.1E-04 | 1.54                     | 5.8E-09 | 1.09           | 2.0E-06 | 1.14                     | 6.3E-05 | 0.68           | 7.1E-03 |                          |  |                |  |                          |  |                |  |                          |  |                |  |
| FEN1              | 0.67                     | 1.8E-03 | 0.60           | 1.5E-03 | 1.01                     | 3.8E-09 | 0.90           | 2.6E-09 | 0.70                     | 1.8E-04 | 0.59           | 7.9E-04 |                          |  |                |  |                          |  |                |  |                          |  |                |  |
| IGLC1             | 1.88                     | 1.9E-03 | 1.82           | 3.5E-04 | 2.65                     | 7.1E-08 | 2.52           | 3.7E-09 | 1.94                     | 1.8E-04 | 1.78           | 1.5E-04 |                          |  |                |  |                          |  |                |  |                          |  |                |  |

Table\_S4.xlsx

| symbol     | TUBE_INFL.log2FoldChange |         | TUBE_INFL.padj |         | TUBE_HLTY.log2FoldChange |         | TUBE_HLTY.padj |         | OXY1_INFL.log2FoldChange |         | OXY1_INFL.padj |         | OXY1_HLTY.log2FoldChange |  | OXY1_HLTY.padj |  | OXY0_INFL.log2FoldChange |  | OXY0_INFL.padj |  | OXY0_HLTY.log2FoldChange |  | OXY0_HLTY.padj |  |
|------------|--------------------------|---------|----------------|---------|--------------------------|---------|----------------|---------|--------------------------|---------|----------------|---------|--------------------------|--|----------------|--|--------------------------|--|----------------|--|--------------------------|--|----------------|--|
| MAD2L1     | 1.45                     | 2.2E-06 | 0.88           | 6.7E-04 | 1.37                     | 1.6E-08 | 0.77           | 1.7E-04 | 1.31                     | 8.9E-07 | 0.69           | 2.9E-03 |                          |  |                |  |                          |  |                |  |                          |  |                |  |
| KIF18A     | 1.13                     | 2.0E-03 | 1.71           | 2.9E-07 | 1.09                     | 1.9E-04 | 1.63           | 1.7E-09 | 0.80                     | 6.4E-03 | 1.36           | 1.1E-05 |                          |  |                |  |                          |  |                |  |                          |  |                |  |
| NUP37      | 0.60                     | 1.7E-05 | 0.48           | 1.0E-04 | 0.47                     | 1.7E-05 | 0.33           | 6.6E-04 | 0.65                     | 1.1E-07 | 0.50           | 8.1E-06 |                          |  |                |  |                          |  |                |  |                          |  |                |  |
| NUF2       | 1.22                     | 2.6E-03 | 1.83           | 8.2E-07 | 1.31                     | 6.9E-05 | 1.87           | 6.5E-10 | 0.83                     | 9.4E-03 | 1.43           | 3.3E-05 |                          |  |                |  |                          |  |                |  |                          |  |                |  |
| STMN1      | 1.06                     | 3.2E-05 | 0.60           | 7.3E-03 | 1.21                     | 2.0E-09 | 0.71           | 7.1E-05 | 1.08                     | 1.3E-06 | 0.57           | 5.1E-03 |                          |  |                |  |                          |  |                |  |                          |  |                |  |
| SELENOS    | 0.31                     | 8.0E-03 | 0.45           | 1.1E-05 | 0.36                     | 1.3E-04 | 0.48           | 4.1E-09 | 0.33                     | 1.6E-03 | 0.44           | 3.8E-06 |                          |  |                |  |                          |  |                |  |                          |  |                |  |
| PCNA       | 0.54                     | 9.1E-04 | 0.38           | 6.2E-03 | 0.70                     | 3.9E-08 | 0.54           | 3.0E-06 | 0.67                     | 2.7E-06 | 0.50           | 2.3E-04 |                          |  |                |  |                          |  |                |  |                          |  |                |  |
| CENPU      | 1.22                     | 1.6E-04 | 1.38           | 1.2E-06 | 1.09                     | 1.7E-05 | 1.22           | 7.0E-08 | 0.75                     | 3.9E-03 | 0.89           | 5.5E-04 |                          |  |                |  |                          |  |                |  |                          |  |                |  |
| TIPIN      | 1.01                     | 8.9E-07 | 0.82           | 2.9E-06 | 0.72                     | 7.4E-06 | 0.53           | 1.6E-04 | 0.69                     | 7.5E-05 | 0.49           | 2.2E-03 |                          |  |                |  |                          |  |                |  |                          |  |                |  |
| PKHD1L1    | 1.29                     | 1.9E-05 | 1.34           | 2.9E-07 | 0.93                     | 6.1E-05 | 0.97           | 2.6E-06 | 0.77                     | 1.8E-03 | 0.81           | 6.8E-04 |                          |  |                |  |                          |  |                |  |                          |  |                |  |
| ANKRD36BP2 | 1.42                     | 3.4E-04 | 0.97           | 3.4E-03 | 1.49                     | 2.3E-06 | 0.99           | 2.0E-04 | 1.82                     | 2.3E-07 | 1.30           | 3.3E-05 |                          |  |                |  |                          |  |                |  |                          |  |                |  |
| IGHV3-66   | 1.50                     | 7.5E-03 | 1.77           | 4.4E-04 | 2.44                     | 5.2E-07 | 2.61           | 1.3E-09 | 1.32                     | 4.2E-03 | 1.55           | 9.0E-04 |                          |  |                |  |                          |  |                |  |                          |  |                |  |
| OSTC       | 0.84                     | 5.0E-06 | 0.48           | 3.0E-03 | 0.74                     | 2.5E-07 | 0.37           | 4.8E-03 | 0.83                     | 2.2E-07 | 0.44           | 2.7E-03 |                          |  |                |  |                          |  |                |  |                          |  |                |  |
| PLK4       | 1.24                     | 6.4E-04 | 1.32           | 2.9E-05 | 1.27                     | 1.2E-05 | 1.31           | 2.7E-07 | 1.01                     | 8.3E-04 | 1.05           | 2.6E-04 |                          |  |                |  |                          |  |                |  |                          |  |                |  |
| PSMD14     | 0.55                     | 2.3E-04 | 0.44           | 9.3E-04 | 0.57                     | 1.2E-06 | 0.43           | 3.1E-05 | 0.56                     | 1.7E-05 | 0.42           | 5.8E-04 |                          |  |                |  |                          |  |                |  |                          |  |                |  |
| NUCB2      | 1.23                     | 6.1E-07 | 1.11           | 1.8E-07 | 0.64                     | 6.4E-04 | 0.53           | 1.7E-03 | 0.72                     | 4.8E-04 | 0.60           | 2.2E-03 |                          |  |                |  |                          |  |                |  |                          |  |                |  |
| CYCS       | 0.36                     | 9.1E-03 | 0.52           | 1.5E-05 | 0.31                     | 4.7E-03 | 0.45           | 2.3E-06 | 0.42                     | 4.3E-04 | 0.55           | 5.3E-07 |                          |  |                |  |                          |  |                |  |                          |  |                |  |
| RPA3       | 0.84                     | 6.0E-06 | 0.77           | 2.6E-06 | 0.51                     | 4.5E-04 | 0.42           | 1.2E-03 | 0.63                     | 1.0E-04 | 0.52           | 5.2E-04 |                          |  |                |  |                          |  |                |  |                          |  |                |  |
| SUV39H2    | 0.91                     | 3.9E-04 | 0.83           | 1.8E-04 | 0.85                     | 2.4E-05 | 0.74           | 2.3E-05 | 0.80                     | 3.1E-04 | 0.66           | 9.1E-04 |                          |  |                |  |                          |  |                |  |                          |  |                |  |
| SEC61G     | 0.99                     | 2.6E-06 | 0.82           | 8.0E-06 | 0.57                     | 4.8E-04 | 0.40           | 7.3E-03 | 0.69                     | 1.1E-04 | 0.51           | 2.8E-03 |                          |  |                |  |                          |  |                |  |                          |  |                |  |
| SKA2       | 0.59                     | 1.6E-03 | 0.49           | 2.6E-03 | 0.50                     | 5.3E-04 | 0.38           | 3.0E-03 | 0.79                     | 7.2E-07 | 0.66           | 7.7E-06 |                          |  |                |  |                          |  |                |  |                          |  |                |  |
| HIBCH      | 0.51                     | 1.1E-03 | 0.63           | 7.3E-06 | 0.38                     | 2.0E-03 | 0.47           | 1.8E-05 | 0.43                     | 1.6E-03 | 0.51           | 7.3E-05 |                          |  |                |  |                          |  |                |  |                          |  |                |  |
| TIMM17A    | 0.39                     | 8.7E-04 | 0.36           | 5.2E-04 | 0.36                     | 9.8E-05 | 0.31           | 1.5E-04 | 0.40                     | 7.4E-05 | 0.35           | 2.6E-04 |                          |  |                |  |                          |  |                |  |                          |  |                |  |
| KDELR2     | 0.40                     | 4.1E-04 | 0.43           | 1.3E-05 | 0.33                     | 2.4E-04 | 0.34           | 1.2E-05 | 0.26                     | 8.3E-03 | 0.27           | 3.3E-03 |                          |  |                |  |                          |  |                |  |                          |  |                |  |
| LARP1B     | 0.72                     | 1.4E-03 | 0.53           | 7.0E-03 | 0.73                     | 3.2E-05 | 0.51           | 9.7E-04 | 0.88                     | 6.7E-06 | 0.64           | 3.3E-04 |                          |  |                |  |                          |  |                |  |                          |  |                |  |
| IER3IP1    | 0.44                     | 8.8E-03 | 0.52           | 5.8E-04 | 0.39                     | 3.5E-03 | 0.43           | 2.3E-04 | 0.59                     | 6.3E-05 | 0.62           | 5.5E-06 |                          |  |                |  |                          |  |                |  |                          |  |                |  |
| ACAT1      | 0.68                     | 3.2E-04 | 0.72           | 2.3E-05 | 0.48                     | 1.1E-03 | 0.48           | 2.3E-04 | 0.50                     | 2.2E-03 | 0.50           | 1.4E-03 |                          |  |                |  |                          |  |                |  |                          |  |                |  |
| ARHGAP42   | 1.04                     | 9.5E-03 | 1.41           | 1.4E-04 | 1.04                     | 1.4E-03 | 1.35           | 7.7E-06 | 0.90                     | 7.2E-03 | 1.20           | 4.2E-04 |                          |  |                |  |                          |  |                |  |                          |  |                |  |
| TXNDC15    | 0.29                     | 5.7E-03 | 0.23           | 9.3E-03 | 0.33                     | 4.4E-05 | 0.26           | 2.1E-04 | 0.32                     | 2.9E-04 | 0.26           | 2.3E-03 |                          |  |                |  |                          |  |                |  |                          |  |                |  |
| GFPT1      | 0.51                     | 2.0E-03 | 0.45           | 2.6E-03 | 0.45                     | 6.0E-04 | 0.36           | 2.4E-03 | 0.51                     | 4.1E-04 | 0.41           | 2.7E-03 |                          |  |                |  |                          |  |                |  |                          |  |                |  |
| DNAJB9     | 0.75                     | 1.3E-03 | 0.74           | 3.1E-04 | 0.48                     | 7.0E-03 | 0.45           | 5.9E-03 | 0.66                     | 7.7E-04 | 0.61           | 1.1E-03 |                          |  |                |  |                          |  |                |  |                          |  |                |  |
| HBS1L      | 0.51                     | 7.6E-04 | 0.47           | 4.3E-04 | 0.35                     | 3.2E-03 | 0.29           | 6.5E-03 | 0.42                     | 1.4E-03 | 0.35           | 4.7E-03 |                          |  |                |  |                          |  |                |  |                          |  |                |  |
| NDUFAB1    | 0.45                     | 3.1E-03 | 0.41           | 2.0E-03 | 0.36                     | 2.7E-03 | 0.31           | 4.5E-03 | 0.39                     | 2.7E-03 | 0.34           | 7.6E-03 |                          |  |                |  |                          |  |                |  |                          |  |                |  |
